# Supplementary material for: Criteria for evaluating molecular markers: Comprehensive quality metrics to improve marker-assisted selection
Source: PubMed Central journal article supplement (PMC6333336; doi:10.1371/journal.pone.0210529), 2019-01-15
Supplement: pone.0210529.s001.pdf [file pone.0210529.s001.pdf]

Supplemental Table 1: List of indel and SSR markers assessed for technical performance

| Marker                 | Chromosome | Position | Marker type |
|------------------------|------------|----------|-------------|
| 1_21705593             | 1          | 21705593 | Indel       |
| 1_27801952             | 1          | 27801952 | Indel       |
| 1_32254725             | 1          | 32254725 | Indel       |
| 1_34198604             | 1          | 34198604 | Indel       |
| 1_36293501             | 1          | 36293501 | Indel       |
| 1_37231928             | 1          | 37231928 | Indel       |
| 1_37588170             | 1          | 37588170 | Indel       |
| 1_37698557             | 1          | 37698557 | Indel       |
| 1_37724349             | 1          | 37724349 | Indel       |
| 1_37796891             | 1          | 37796891 | Indel       |
| 1_37903562             | 1          | 37903562 | Indel       |
| Os01g0874100           | 1          | 37918160 | Indel       |
| 1_39501901             | 1          | 39501901 | Indel       |
| MSU6_2_973068_[Indel]  | 2          | 973068   | Indel       |
| MSU6_2_3949702_[Indel] | 2          | 3949702  | Indel       |
| MSU6_2_5241905_[Indel] | 2          | 5241905  | Indel       |
| 2_7499561              | 2          | 7499561  | Indel       |
| 2_8594377              | 2          | 8594377  | Indel       |
| 2_9003534              | 2          | 9003534  | Indel       |
| 2_10315707             | 2          | 10315707 | Indel       |
| 2_10865762             | 2          | 10865762 | Indel       |
| 2_11120246             | 2          | 11120246 | Indel       |
| 2_11265804             | 2          | 11265804 | Indel       |
| 2_13611036             | 2          | 13611036 | Indel       |
| 3_179286               | 3          | 179286   | Indel       |
| 3_190373               | 3          | 190373   | Indel       |
| 3_1850409              | 3          | 1850409  | Indel       |
| 3_2163413              | 3          | 2163413  | Indel       |
| 3_3775875              | 3          | 3775875  | Indel       |
| 3_4519585              | 3          | 4519585  | Indel       |
| 3_4800740              | 3          | 4800740  | Indel       |
| 3_7018296              | 3          | 7018296  | Indel       |
| 3_7035021              | 3          | 7035021  | Indel       |
| 3_7231633              | 3          | 7231633  | Indel       |
| 3_8062383              | 3          | 8062383  | Indel       |
| 3_27422379             | 3          | 27422379 | Indel       |
| 3_28739422             | 3          | 28739422 | Indel       |
| LOC_Os03g50470         | 3          | 28798244 | Indel       |
| 3_28965396             | 3          | 28965396 | Indel       |
| 3_28975124             | 3          | 28975124 | Indel       |
| 3_29117723             | 3          | 29117723 | Indel       |
| 3_29604053             | 3          | 29604053 | Indel       |
| 3_29660435             | 3          | 29660435 | Indel       |
| 3_33106036             | 3          | 33106036 | Indel       |
| 3_33118992             | 3          | 33118992 | Indel       |
| 3_34931082             | 3          | 34931082 | Indel       |
| 3_35574371             | 3          | 35574371 | Indel       |
| MSU6_4_196102_[Indel]  | 4          | 196102   | Indel       |

Supplemental Table 1: List of indel and SSR markers assessed for technical performance

| Marker                  | Chromosome | Position | Marker type |
|-------------------------|------------|----------|-------------|
| MSU6_4_1068894_[Indel]  | 4          | 1068894  | Indel       |
| MSU6_4_1329641_[Indel]  | 4          | 1329641  | Indel       |
| MSU6_4_1977984_[indel]  | 4          | 1977984  | Indel       |
| MSU6_4_2281606_[Indel]  | 4          | 2281606  | Indel       |
| MSU6_4_17302271_[Indel] | 4          | 17302271 | Indel       |
| MSU6_4_17414046_[Indel] | 4          | 17414046 | Indel       |
| MSU6_4_17536240_[Indel] | 4          | 17536240 | Indel       |
| MSU6_4_17987548_[Indel] | 4          | 17987548 | Indel       |
| MSU6_4_18081825_[Indel] | 4          | 18081825 | Indel       |
| MSU6_4_18349442_[Indel] | 4          | 18349442 | Indel       |
| MSU6_4_19012894_[Indel] | 4          | 19012894 | Indel       |
| MSU7_5_438902_[0/-35]   | 5          | 438902   | Indel       |
| MSU7_6_1767284_[Indel]  | 6          | 1767284  | Indel       |
| MSU7_6_6754433_[Indel]  | 6          | 6754433  | Indel       |
| 7_218555                | 7          | 218555   | Indel       |
| 7_503640                | 7          | 503640   | Indel       |
| 7_821345                | 7          | 821345   | Indel       |
| 7_1288962               | 7          | 1288962  | Indel       |
| 7_3500120               | 7          | 3500120  | Indel       |
| 7_4854494               | 7          | 4854494  | Indel       |
| 7_6062026 bHLH          | 7          | 6062026  | Indel       |
| 7_8052183 MYB           | 7          | 8052183  | Indel       |
| 7_8152295               | 7          | 8152295  | Indel       |
| Os08g0424500 BADH2      | 8          | 20380144 | Indel       |
| 11_2456241              | 11         | 2456241  | Indel       |
| MSU7_11_3765242_[Indel] | 11         | 3765242  | Indel       |
| MSU7_11_3914993_[Indel] | 11         | 3914993  | Indel       |
| MSU7_11_4116877_[Indel] | 11         | 4116877  | Indel       |
| MSU7_11_4301013_[Indel] | 11         | 4301013  | Indel       |
| 11_4328892              | 11         | 4328892  | Indel       |
| MSU7_11_4439870_[Indel] | 11         | 4439870  | Indel       |
| MSU7_11_5173655_[Indel] | 11         | 5173655  | Indel       |
| 12_3024705              | 12         | 3024705  | Indel       |
| 12_7280706              | 12         | 7280706  | Indel       |
| 12_9799992              | 12         | 9799992  | Indel       |
| 12_10965030             | 12         | 10965030 | Indel       |
| 12_14112244             | 12         | 14112244 | Indel       |
| 12_22063196             | 12         | 22063196 | Indel       |
| RM10115                 | 1          | 2154332  | SSR         |
| RM490                   | 1          | 6676195  | SSR         |
| RM3412b                 | 1          | 11566961 | SSR         |
| RM493                   | 1          | 12264091 | SSR         |
| RM140                   | 1          | 12284725 | SSR         |
| RM10864                 | 1          | 14236113 | SSR         |
| RM7075                  | 1          | 15101795 | SSR         |
| RM3482                  | 1          | 39713330 | SSR         |
| RM14                    | 1          | 41362794 | SSR         |
| RM12208                 | 1          | 41935041 | SSR         |

Supplemental Table 1: List of indel and SSR markers assessed for technical performance

| Marker  | Chromosome | Position | Marker type |
|---------|------------|----------|-------------|
| RM5626  | 3          | 24671259 | SSR         |
| RM6329  | 3          | 28608271 | SSR         |
| RM3867  | 3          | 31540070 | SSR         |
| R3M53   | 3          | 32255684 | SSR         |
| RM7076  | 3          | 33446993 | SSR         |
| RM7389  | 3          | 35948517 | SSR         |
| RM11    | 7          | 19204350 | SSR         |
| RM172   | 7          | 29561293 | SSR         |
| RM23877 | 9          | 6347247  | SSR         |
| RM17    | 12         | 27024527 | SSR         |
