# Supplementary material for: Criteria for evaluating molecular markers: Comprehensive quality metrics to improve marker-assisted selection
Source: PubMed Central journal article supplement (PMC6333336; doi:10.1371/journal.pone.0210529), 2019-01-15
Supplement: pone.0210529.s002.pdf [file pone.0210529.s002.pdf]

Supplemental Table 2: List of varieties examined for technical performance evaluation.

| Variety name      |
|-------------------|
| Azucena           |
| BINA dhan 10      |
| BINA dhan 8       |
| Boilam            |
| BR11              |
| BR24              |
| BR28              |
| BR29              |
| BRR1 dhan 55      |
| BRR1 dhan 61      |
| Capsule           |
| Cheriviruppu      |
| Co39              |
| CR dhan 405       |
| CSR 28            |
| CSR 36            |
| CSR-89 IR-15      |
| CSR-90 IR-2       |
| Daw Hawm          |
| Eratio            |
| FL478             |
| Gundang           |
| IR28              |
| IR29              |
| IR42              |
| IR5               |
| IR56              |
| IR64              |
| IR72046-B-R-3     |
| IR74              |
| IR77298-14-1-2-10 |
| IR8               |
| IRRI 101          |
| IRRI 102          |
| IRRI 103          |
| IRRI 104          |
| IRRI 105          |
| IRRI 106          |
| IRRI 108          |
| IRRI 109          |
| IRRI 110          |
| IRRI 111          |
| IRRI 112          |
| IRRI 113          |
| IRRI 114          |
| IRRI 115          |
| IRRI 116          |
| IRRI 117          |

Supplemental Table 2: List of varieties examined for technical performance evaluation.

| Variety name |
|--------------|
| IRRI 118     |
| IRRI 119     |
| IRRI 120     |
| IRRI 121     |
| IRRI 122     |
| IRRI 123     |
| IRRI 124     |
| IRRI 125     |
| IRRI 126     |
| IRRI 127     |
| IRRI 128     |
| IRRI 129     |
| IRRI 130     |
| IRRI 131     |
| IRRI 132     |
| IRRI 133     |
| IRRI 134     |
| IRRI 135     |
| IRRI 136     |
| IRRI 138     |
| IRRI 139     |
| IRRI 140     |
| IRRI 141     |
| IRRI 142     |
| IRRI 143     |
| IRRI 145     |
| IRRI 146     |
| IRRI 147     |
| IRRI 148     |
| IRRI 149     |
| IRRI 150     |
| IRRI 151     |
| IRRI 152     |
| IRRI 154     |
| IRRI 155     |
| IRRI 156     |
| IRRI 157     |
| IRRI 158     |
| IRRI 159     |
| IRRI 160     |
| IRRI 161     |
| IRRI 162     |
| IRRI 163     |
| IRRI 164     |
| IRRI 165     |
| IRRI 167     |
| IRRI 168     |
| IRRI 169     |

Supplemental Table 2: List of varieties examined for technical performance evaluation.

| Variety name        |
|---------------------|
| IRRI 170            |
| IRRI 171            |
| IRRI 172            |
| IRRI 173            |
| IRRI 174            |
| IRRI 175            |
| IRRI 176            |
| IRRI 177            |
| IRRI 178            |
| IRRI 179            |
| IRRI 180            |
| IRRI 181            |
| IRRI 184            |
| IRRI 185            |
| Jumbo Jet           |
| Kala Rata           |
| Makassane           |
| Moroberekan         |
| Nona Bokra          |
| POKKALI             |
| Pokkali 26869       |
| Pokkali 8948        |
| PSB Rc82            |
| Sambha Mahsuri-Sub1 |
| SR 26 b             |
