# Supplementary material for: Criteria for evaluating molecular markers: Comprehensive quality metrics to improve marker-assisted selection
Source: PubMed Central journal article supplement (PMC6333336; doi:10.1371/journal.pone.0210529), 2019-01-15
Supplement: pone.0210529.s003.pdf [file pone.0210529.s003.pdf]

Supplemental Table 3. List of varieties used in calculating biological accuracy and breeding metrics.

| Name               | Cultivation Status |
|--------------------|--------------------|
| FL478              | Breeding line      |
| IR77298-5-6-11     | Breeding line      |
| IR81896-B-B-195    | Breeding line      |
| IR81896-B-B-431    | Breeding line      |
| IR81896-B-B-74     | Breeding line      |
| IRBB60             | Breeding line      |
| IRBB62             | Breeding line      |
| IRBB7              | Breeding line      |
| Aomierte 168       | Cultivar           |
| Apo                | Cultivar           |
| ASD1               | Cultivar           |
| Avo                | Cultivar           |
| Bala               | Cultivar           |
| Banjiemang 2       | Cultivar           |
| BG300              | Cultivar           |
| BG304              | Cultivar           |
| BG90-2             | Cultivar           |
| BG94-1             | Cultivar           |
| BINA dhan 10       | Cultivar           |
| Binam              | Cultivar           |
| BR11               | Cultivar           |
| BR24               | Cultivar           |
| BR28               | Cultivar           |
| BR29               | Cultivar           |
| Co22               | Cultivar           |
| Co39               | Cultivar           |
| CR dhan 405        | Cultivar           |
| CR147-392-4        | Cultivar           |
| CSR89              | Cultivar           |
| CSR90              | Cultivar           |
| Cypress            | Cultivar           |
| Dasanbyeo          | Cultivar           |
| Dinorado           | Cultivar           |
| Drew               | Cultivar           |
| G Zhenshan 97B     | Cultivar           |
| GalsaegSsal Sharei | Cultivar           |
| GIZA159            | Cultivar           |
| Giza178            | Cultivar           |
| Hnankar            | Cultivar           |
| IAC165             | Cultivar           |
| IAC3               | Cultivar           |
| IAC47              | Cultivar           |
| IET1444            | Cultivar           |
| IR02A127           | Cultivar           |
| IR03A568           | Cultivar           |
| IR04A115           | Cultivar           |
| IR05N412           | Cultivar           |
| IR06A150           | Cultivar           |

Supplemental Table 3. List of varieties used in calculating biological accuracy and breeding metrics.

| Name                | Cultivation Status |
|---------------------|--------------------|
| IR06G113            | Cultivar           |
| IR06N209            | Cultivar           |
| IR07A234            | Cultivar           |
| IR07F287            | Cultivar           |
| IR07F290            | Cultivar           |
| IR08A172            | Cultivar           |
| IR08A176            | Cultivar           |
| IR08N194            | Cultivar           |
| IR09A136            | Cultivar           |
| IR09A138            | Cultivar           |
| IR09F436            | Cultivar           |
| IR09N190            | Cultivar           |
| IR09N496            | Cultivar           |
| IR09N514            | Cultivar           |
| IR09N530            | Cultivar           |
| IR09N531            | Cultivar           |
| IR09N538            | Cultivar           |
| IR09N542            | Cultivar           |
| IR10179-23-1-3      | Cultivar           |
| IR10F365            | Cultivar           |
| IR10N108            | Cultivar           |
| IR22                | Cultivar           |
| IR24                | Cultivar           |
| IR26                | Cultivar           |
| IR28                | Cultivar           |
| IR29                | Cultivar           |
| IR31917             | Cultivar           |
| IR34                | Cultivar           |
| IR42                | Cultivar           |
| IR42                | Cultivar           |
| IR45427-2B-2-2B-1-1 | Cultivar           |
| IR55419             | Cultivar           |
| IR56                | Cultivar           |
| IR58025B            | Cultivar           |
| IR58821-23-1-3-1    | Cultivar           |
| IR6                 | Cultivar           |
| IR62266-42-6-2      | Cultivar           |
| IR64                | Cultivar           |
| IR64A               | Cultivar           |
| IR65600-27-1-2-2    | Cultivar           |
| IR66897B            | Cultivar           |
| IR66946-3R-178-1-1  | Cultivar           |
| IR68                | Cultivar           |
| IR68552-55-3-2      | Cultivar           |
| IR71466-75-3-B-1    | Cultivar           |
| IR73004-3-1-2-1     | Cultivar           |
| IR74                | Cultivar           |
| IR77298-14-1-2-10   | Cultivar           |

Supplemental Table 3. List of varieties used in calculating biological accuracy and breeding metrics.

| Name               | Cultivation Status |
|--------------------|--------------------|
| IR8                | Cultivar           |
| IR8192-200-3-3-1-1 | Cultivar           |
| IRAT352            | Cultivar           |
| IRBB23             | Cultivar           |
| IRBB61             | Cultivar           |
| IRBB62             | Cultivar           |
| IRBB64             | Cultivar           |
| IRBB65             | Cultivar           |
| IRRI110            | Cultivar           |
| IRRI119            | Cultivar           |
| IRRI123            | Cultivar           |
| IRRI139            | Cultivar           |
| IRRI146            | Cultivar           |
| IRRI146            | Cultivar           |
| IRRI147            | Cultivar           |
| IRRI147            | Cultivar           |
| IRRI154            | Cultivar           |
| IRRI168            | Cultivar           |
| IRRI171            | Cultivar           |
| IRRI174            | Cultivar           |
| IRRI181            | Cultivar           |
| Jinbubyeo          | Cultivar           |
| Katy               | Cultivar           |
| Kotobuki-Mochi     | Cultivar           |
| Lemont             | Cultivar           |
| Lijian 942         | Cultivar           |
| Litchikiang        | Cultivar           |
| LTH                | Cultivar           |
| M202               | Cultivar           |
| M23                | Cultivar           |
| M401               | Cultivar           |
| Makassane          | Cultivar           |
| Manaw-Thuka        | Cultivar           |
| Matatag2           | Cultivar           |
| Milyang 30         | Cultivar           |
| Milyang 77         | Cultivar           |
| MILYANG23          | Cultivar           |
| Minghui 63         | Cultivar           |
| Monolaya           | Cultivar           |
| MS11               | Cultivar           |
| MTU1010            | Cultivar           |
| NERICA-1           | Cultivar           |
| NERICA-2           | Cultivar           |
| NERICA-2           | Cultivar           |
| NERICA-8           | Cultivar           |
| NERICA-9           | Cultivar           |
| NERICA-L-20        | Cultivar           |
| NERICA-L-27        | Cultivar           |

Supplemental Table 3. List of varieties used in calculating biological accuracy and breeding metrics.

| Name                 | Cultivation Status |
|----------------------|--------------------|
| NSIC Rc222           | Cultivar           |
| OM1706               | Cultivar           |
| OM997                | Cultivar           |
| Pankhari 203         | Cultivar           |
| PSB Rc10             | Cultivar           |
| PSB Rc18             | Cultivar           |
| PSB Rc18             | Cultivar           |
| PSB Rc50             | Cultivar           |
| PSB Rc68             | Cultivar           |
| PSB Rc80             | Cultivar           |
| PSB Rc82             | Cultivar           |
| PSB Rc86             | Cultivar           |
| PSB Rc88             | Cultivar           |
| Pusa Basmati 1       | Cultivar           |
| Sambha Mahsuri-Sub1  | Cultivar           |
| San Huang Zhan No. 2 | Cultivar           |
| SR26B                | Cultivar           |
| Sri Lanka 1          | Cultivar           |
| Swarna               | Cultivar           |
| Swarna-Sub1          | Cultivar           |
| Tadukan              | Cultivar           |
| TDK1                 | Cultivar           |
| TKM9                 | Cultivar           |
| TN1                  | Cultivar           |
| TOG5674              | Cultivar           |
| Tongil 101           | Cultivar           |
| Tongil 78            | Cultivar           |
| Vandana              | Cultivar           |
| Way Rarem            | Cultivar           |
| 4583                 | Landrace           |
| 36067-1              | Landrace           |
| 498-2A-BR-8          | Landrace           |
| Adday Sel            | Landrace           |
| ADR52                | Landrace           |
| Angifotsy            | Landrace           |
| ARC12536             | Landrace           |
| Azucena              | Landrace           |
| Baiang 6             | Landrace           |
| Basmati 1            | Landrace           |
| Basmati 385          | Landrace           |
| Beizينو              | Landrace           |
| Bikyat               | Landrace           |
| Bue Ga Wa            | Landrace           |
| Bueng Mong Leng Wei  | Landrace           |
| Capsule              | Landrace           |
| Daw Hawm             | Landrace           |
| Dhola Aman           | Landrace           |
| E Daw Hawm           | Landrace           |

Supplemental Table 3. List of varieties used in calculating biological accuracy and breeding metrics.

| Name             | Cultivation Status |
|------------------|--------------------|
| Eratio           | Landrace           |
| Fan Geng 6       | Landrace           |
| Fanhaopi         | Landrace           |
| Flipper          | Landrace           |
| Gundang          | Landrace           |
| Hasawi           | Landrace           |
| Honderawala      | Landrace           |
| JumboJet         | Landrace           |
| Kali Aus         | Landrace           |
| Kasalath         | Landrace           |
| KDML105          | Landrace           |
| Khao Hlan On     | Landrace           |
| Khao Nan         | Landrace           |
| Kharsu           | Landrace           |
| Kulon            | Landrace           |
| Lab              | Landrace           |
| Malchi           | Landrace           |
| Malogbana        | Landrace           |
| Ma-Zhan Red      | Landrace           |
| Moroberekan      | Landrace           |
| N22              | Landrace           |
| Nam Jam          | Landrace           |
| Nanhi            | Landrace           |
| NCS-599          | Landrace           |
| Nipponbare       | Landrace           |
| NonaBokra        | Landrace           |
| NX-3533          | Landrace           |
| Nyao             | Landrace           |
| Phaka Rumduol    | Landrace           |
| Pokkali          | Landrace           |
| Pokkali (8558)   | Landrace           |
| PTB-18           | Landrace           |
| Rayada           | Landrace           |
| Riz type Sorgho  | Landrace           |
| Roxani           | Landrace           |
| Sadri            | Landrace           |
| Sadri rice 1     | Landrace           |
| Shinchikulku 103 | Landrace           |
| SML Awini        | Landrace           |
| Sossoka          | Landrace           |
| Taichung 65      | Landrace           |
| Tetep            | Landrace           |
| Tima             | Landrace           |
| Tjere Sugi       | Landrace           |
| TOG6542          | Landrace           |
| TOG7291          | Landrace           |
| Tres Meses       | Landrace           |
| Vary 5000 Fotsy  | Landrace           |

Supplemental Table 3. List of varieties used in calculating biological accuracy and breeding metrics.

| Name          | Cultivation Status |
|---------------|--------------------|
| Xiushui 115   | Landrace           |
| Zhongchao 123 | Landrace           |
