# Supplementary material for: Criteria for evaluating molecular markers: Comprehensive quality metrics to improve marker-assisted selection
Source: PubMed Central journal article supplement (PMC6333336; doi:10.1371/journal.pone.0210529), 2019-01-15
Supplement: pone.0210529.s004.pdf [file pone.0210529.s004.pdf]

Supplemental Table 4. List of marker positions interrogated for assessing biological accuracy and breeding metrics. All positions are relative to the MSU7 reference genome

| Marker name   | Chromosome | Position | Favourable allele | Unfavourable allele | Target QTL | Marker linkage | Specificity | Fingerprinting? | Source        | Marker type |
|---------------|------------|----------|-------------------|---------------------|------------|----------------|-------------|-----------------|---------------|-------------|
| 9558526       | 9          | 12036453 | A                 | G                   | AG1        | Foreground     | Anonymous   |                 | Infinium chip | SNP         |
| 9563291       | 9          | 12154616 | C                 | T                   | AG1        | Foreground     | Anonymous   |                 | Infinium chip | SNP         |
| 9565186       | 9          | 12219648 | C                 | A                   | AG1        | Foreground     | Anonymous   |                 | Infinium chip | SNP         |
| 9569595       | 9          | 12326525 | G                 | A                   | AG1        | Foreground     | Anonymous   |                 | Infinium chip | SNP         |
| 9578301       | 9          | 12545658 | G                 | T                   | AG1        | Foreground     | Anonymous   |                 | Infinium chip | SNP         |
| 3921623       | 4          | 6835634  | A                 | G                   | BPH17      | Foreground     | Anonymous   |                 | Infinium chip | SNP         |
| id4002671     | 4          | 6913215  | A                 | G                   | BPH17      | Foreground     | Anonymous   |                 | Infinium chip | SNP         |
| 3933751       | 4          | 7170237  | C                 | T                   | BPH17      | Foreground     | Anonymous   |                 | Infinium chip | SNP         |
| 5859730       | 6          | 1272777  | G                 | A                   | BPH3       | Foreground     | Anonymous   | Fingerprinting  | Infinium chip | SNP         |
| id6000911     | 6          | 1378891  | A                 | G                   | BPH3       | Foreground     | Anonymous   | Fingerprinting  | Infinium chip | SNP         |
| 5865517       | 6          | 1421311  | A                 | C                   | BPH3       | Foreground     | Anonymous   | Fingerprinting  | Infinium chip | SNP         |
| SNP-6_1500959 | 6          | 1501961  | A                 | G                   | BPH3       | Foreground     | Anonymous   | Fingerprinting  | Infinium chip | SNP         |
| 5868825       | 6          | 1521855  | A                 | C                   | BPH3       | Foreground     | Anonymous   | Fingerprinting  | Infinium chip | SNP         |
| fd8           | 6          | 1768006  | A                 | C                   | BPH3       | Foreground     | Anonymous   | Fingerprinting  | Infinium chip | SNP         |
| 4904201       | 5          | 3253516  | G                 | A                   | Chalk5     | Foreground     | Anonymous   |                 | Infinium chip | SNP         |
| 4904312       | 5          | 3260320  | C                 | A                   | Chalk5     | Foreground     | Anonymous   |                 | Infinium chip | SNP         |
| 4908650       | 5          | 3427089  | A                 | G                   | Chalk5     | Foreground     | Anonymous   |                 | Infinium chip | SNP         |
| 4909480       | 5          | 3452362  | C                 | T                   | Chalk5     | Foreground     | Anonymous   |                 | Infinium chip | SNP         |
| 4909734       | 5          | 3470087  | C                 | A                   | Chalk5     | Foreground     | Anonymous   |                 | Infinium chip | SNP         |
| 4668476       | 4          | 30174083 | T                 | C                   | COLD1      | Foreground     | Anonymous   |                 | Infinium chip | SNP         |
| id4010220     | 4          | 30330971 | G                 | A                   | COLD1      | Foreground     | Anonymous   |                 | Infinium chip | SNP         |
| 4672837       | 4          | 30362053 | A                 | C                   | COLD1      | Foreground     | Anonymous   |                 | Infinium chip | SNP         |
| id4010238     | 4          | 30393769 | A                 | G                   | COLD1      | Foreground     | Anonymous   |                 | Infinium chip | SNP         |
| 4674556       | 4          | 30442759 | T                 | C                   | COLD1      | Foreground     | Anonymous   |                 | Infinium chip | SNP         |
| 4678550       | 4          | 30601123 | G                 | A                   | COLD1      | Foreground     | Anonymous   |                 | Infinium chip | SNP         |
| 4683917       | 4          | 30843348 | G                 | A                   | COLD1      | Foreground     | Anonymous   |                 | Infinium chip | SNP         |
| 4683923       | 4          | 30843753 | C                 | A                   | COLD1      | Foreground     | Anonymous   |                 | Infinium chip | SNP         |
| 4684914       | 4          | 30879875 | T                 | C                   | COLD1      | Foreground     | Anonymous   |                 | Infinium chip | SNP         |
| id4010433     | 4          | 30920978 | A                 | G                   | COLD1      | Foreground     | Anonymous   |                 | Infinium chip | SNP         |
| 4689325       | 4          | 31052578 | G                 | T                   | COLD1      | Foreground     | Anonymous   |                 | Infinium chip | SNP         |

Supplemental Table 4. List of marker positions interrogated for assessing biological accuracy and breeding metrics. All positions are relative to the MSU7 reference genome

| Marker name | Chromosome | Position | Favourable allele | Unfavourable allele | Target QTL | Marker linkage | Specificity | Fingerprinting? | Source        | Marker type |
|-------------|------------|----------|-------------------|---------------------|------------|----------------|-------------|-----------------|---------------|-------------|
| 8638449     | 8          | 16394577 | C                 | T                   | DEP1       | Foreground     | Anonymous   |                 | Infinium chip | SNP         |
| 8640428     | 8          | 16439432 | A                 | G                   | DEP1       | Foreground     | Anonymous   |                 | Infinium chip | SNP         |
| 8640728     | 8          | 16443521 | G                 | A                   | DEP1       | Foreground     | Anonymous   |                 | Infinium chip | SNP         |
| ud8001065   | 8          | 16454443 | A                 | G                   | DEP1       | Foreground     | Anonymous   |                 | Infinium chip | SNP         |
| id8004340   | 8          | 16523573 | G                 | T                   | DEP1       | Foreground     | Anonymous   |                 | Infinium chip | SNP         |
| 8107849     | 8          | 4101332  | G                 | T                   | DTH8       | Foreground     | Anonymous   |                 | Infinium chip | SNP         |
| 8115231     | 8          | 4306618  | A                 | G                   | DTH8       | Foreground     | Anonymous   |                 | Infinium chip | SNP         |
| 8115442     | 8          | 4310448  | T                 | C                   | DTH8       | Foreground     | Anonymous   |                 | Infinium chip | SNP         |
| 8120894     | 8          | 4511882  | C                 | T                   | DTH8       | Foreground     | Anonymous   |                 | Infinium chip | SNP         |
| 8122868     | 8          | 4603854  | A                 | C                   | DTH8       | Foreground     | Anonymous   |                 | Infinium chip | SNP         |
| id1024092   | 1          | 38024269 | C                 | A                   | DTY1.1     | Foreground     | Anonymous   |                 | Infinium chip | SNP         |
| id1024129   | 1          | 38049983 | C                 | T                   | DTY1.1     | Foreground     | Anonymous   |                 | Infinium chip | SNP         |
| 1225497     | 1          | 38224245 | C                 | T                   | DTY1.1     | Foreground     | Anonymous   |                 | Infinium chip | SNP         |
| 1226391     | 1          | 38258929 | G                 | T                   | DTY1.1     | Foreground     | Anonymous   |                 | Infinium chip | SNP         |
| 1226694     | 1          | 38276174 | C                 | T                   | DTY1.1     | Foreground     | Anonymous   |                 | Infinium chip | SNP         |
| 1230423     | 1          | 38406155 | G                 | A                   | DTY1.1     | Foreground     | Anonymous   |                 | Infinium chip | SNP         |
| 1231498     | 1          | 38446499 | G                 | T                   | DTY1.1     | Foreground     | Anonymous   |                 | Infinium chip | SNP         |
| 1237300     | 1          | 38652270 | T                 | C                   | DTY1.1     | Foreground     | Anonymous   |                 | Infinium chip | SNP         |
| 1238760     | 1          | 38706387 | C                 | T                   | DTY1.1     | Foreground     | Anonymous   | Fingerprinting  | Infinium chip | SNP         |
| 1240276     | 1          | 38760678 | G                 | A                   | DTY1.1     | Foreground     | Anonymous   |                 | Infinium chip | SNP         |
| 1243398     | 1          | 38847770 | C                 | T                   | DTY1.1     | Foreground     | Anonymous   | Fingerprinting  | Infinium chip | SNP         |
| 1250974     | 1          | 39076741 | G                 | A                   | DTY1.1     | Foreground     | Anonymous   |                 | Infinium chip | SNP         |
| 12707111    | 12         | 17066946 | C                 | T                   | DTY12.1    | Foreground     | Anonymous   |                 | Infinium chip | SNP         |
| id12005832  | 12         | 17443323 | C                 | T                   | DTY12.1    | Foreground     | Anonymous   |                 | Infinium chip | SNP         |
| 12731194    | 12         | 17546633 | T                 | C                   | DTY12.1    | Foreground     | Anonymous   |                 | Infinium chip | SNP         |
| 12732307    | 12         | 17571428 | C                 | T                   | DTY12.1    | Foreground     | Anonymous   |                 | Infinium chip | SNP         |
| id12005912  | 12         | 17571574 | G                 | A                   | DTY12.1    | Foreground     | Anonymous   |                 | Infinium chip | SNP         |
| 1653063     | 2          | 9570228  | G                 | A                   | DTY2.1     | Foreground     | Anonymous   |                 | Infinium chip | SNP         |
| 1661393     | 2          | 9801099  | T                 | G                   | DTY2.1     | Foreground     | Anonymous   |                 | Infinium chip | SNP         |
| 1667329     | 2          | 9963856  | C                 | T                   | DTY2.1     | Foreground     | Anonymous   |                 | Infinium chip | SNP         |

Supplemental Table 4. List of marker positions interrogated for assessing biological accuracy and breeding metrics. All positions are relative to the MSU7 reference genome

| Marker name | Chromosome | Position | Favourable allele | Unfavourable allele | Target QTL | Marker linkage | Specificity | Fingerprinting? | Source        | Marker type |
|-------------|------------|----------|-------------------|---------------------|------------|----------------|-------------|-----------------|---------------|-------------|
| 1667949     | 2          | 9975660  | A                 | G                   | DTY2.1     | Foreground     | Anonymous   | Fingerprinting  | Infinium chip | SNP         |
| 1675311     | 2          | 10169097 | C                 | T                   | DTY2.1     | Foreground     | Anonymous   |                 | Infinium chip | SNP         |
| 1678844     | 2          | 10274389 | C                 | T                   | DTY2.1     | Foreground     | Anonymous   |                 | Infinium chip | SNP         |
| 1687403     | 2          | 10494416 | C                 | T                   | DTY2.1     | Foreground     | Anonymous   |                 | Infinium chip | SNP         |
| 1689518     | 2          | 10555263 | T                 | C                   | DTY2.1     | Foreground     | Anonymous   |                 | Infinium chip | SNP         |
| 1698201     | 2          | 10744597 | C                 | T                   | DTY2.1     | Foreground     | Anonymous   |                 | Infinium chip | SNP         |
| id2005033   | 2          | 10747159 | T                 | C                   | DTY2.1     | Foreground     | Anonymous   |                 | Infinium chip | SNP         |
| id2005152   | 2          | 10874369 | T                 | G                   | DTY2.1     | Foreground     | Anonymous   | Fingerprinting  | Infinium chip | SNP         |
| id2005182   | 2          | 10995452 | A                 | G                   | DTY2.1     | Foreground     | Anonymous   |                 | Infinium chip | SNP         |
| 1711443     | 2          | 11052053 | C                 | T                   | DTY2.1     | Foreground     | Anonymous   |                 | Infinium chip | SNP         |
| 1713544     | 2          | 11102127 | G                 | T                   | DTY2.1     | Foreground     | Anonymous   |                 | Infinium chip | SNP         |
| 1713554     | 2          | 11102648 | C                 | T                   | DTY2.1     | Foreground     | Anonymous   |                 | Infinium chip | SNP         |
| 1714923     | 2          | 11133163 | G                 | A                   | DTY2.1     | Foreground     | Anonymous   |                 | Infinium chip | SNP         |
| 1715617     | 2          | 11153201 | G                 | A                   | DTY2.1     | Foreground     | Anonymous   |                 | Infinium chip | SNP         |
| 1717430     | 2          | 11227552 | C                 | T                   | DTY2.1     | Foreground     | Anonymous   |                 | Infinium chip | SNP         |
| 1725183     | 2          | 11437686 | G                 | A                   | DTY2.1     | Foreground     | Anonymous   |                 | Infinium chip | SNP         |
| 1727846     | 2          | 11515882 | G                 | A                   | DTY2.1     | Foreground     | Anonymous   |                 | Infinium chip | SNP         |
| id2005453   | 2          | 11701123 | A                 | G                   | DTY2.1     | Foreground     | Anonymous   |                 | Infinium chip | SNP         |
| id2005462   | 2          | 11707238 | G                 | A                   | DTY2.1     | Foreground     | Anonymous   |                 | Infinium chip | SNP         |
| 1739007     | 2          | 11861014 | A                 | G                   | DTY2.1     | Foreground     | Anonymous   |                 | Infinium chip | SNP         |
| 1741033     | 2          | 11996866 | T                 | G                   | DTY2.1     | Foreground     | Anonymous   |                 | Infinium chip | SNP         |
| 1741464     | 2          | 12035419 | C                 | A                   | DTY2.1     | Foreground     | Anonymous   |                 | Infinium chip | SNP         |
| id2000917   | 2          | 1064938  | G                 | A                   | DTY2.2     | Foreground     | Anonymous   |                 | Infinium chip | SNP         |
| id2001296   | 2          | 2013925  | A                 | G                   | DTY2.2     | Foreground     | Anonymous   |                 | Infinium chip | SNP         |
| id2001318   | 2          | 2077711  | G                 | A                   | DTY2.2     | Foreground     | Anonymous   |                 | Infinium chip | SNP         |
| id2001463   | 2          | 2408032  | T                 | A                   | DTY2.2     | Foreground     | Anonymous   |                 | Infinium chip | SNP         |
| id2001540   | 2          | 2787469  | G                 | A                   | DTY2.2     | Foreground     | Anonymous   |                 | Infinium chip | SNP         |
| id2001547   | 2          | 2793214  | A                 | G                   | DTY2.2     | Foreground     | Anonymous   |                 | Infinium chip | SNP         |
| id2002065   | 2          | 3839369  | A                 | G                   | DTY2.2     | Foreground     | Anonymous   |                 | Infinium chip | SNP         |
| id2002246   | 2          | 4165922  | G                 | C                   | DTY2.2     | Foreground     | Anonymous   | Fingerprinting  | Infinium chip | SNP         |

Supplemental Table 4. List of marker positions interrogated for assessing biological accuracy and breeding metrics. All positions are relative to the MSU7 reference genome

| Marker name | Chromosome | Position | Favourable allele | Unfavourable allele | Target QTL | Marker linkage | Specificity | Fingerprinting? | Source        | Marker type |
|-------------|------------|----------|-------------------|---------------------|------------|----------------|-------------|-----------------|---------------|-------------|
| id2002281   | 2          | 4300257  | A                 | C                   | DTY2.2     | Foreground     | Anonymous   | Fingerprinting  | Infinium chip | SNP         |
| id2002330   | 2          | 4424424  | C                 | T                   | DTY2.2     | Foreground     | Anonymous   | Fingerprinting  | Infinium chip | SNP         |
| id2002606   | 2          | 4909682  | C                 | T                   | DTY2.2     | Foreground     | Anonymous   |                 | Infinium chip | SNP         |
| id2002811   | 2          | 5242068  | T                 | C                   | DTY2.2     | Foreground     | Anonymous   |                 | Infinium chip | SNP         |
| 3408998     | 3          | 30119566 | T                 | C                   | DTY3.1     | Foreground     | Anonymous   |                 | Infinium chip | SNP         |
| 3412475     | 3          | 30247826 | G                 | T                   | DTY3.1     | Foreground     | Anonymous   |                 | Infinium chip | SNP         |
| rd3001030   | 3          | 30253323 | C                 | A                   | DTY3.1     | Foreground     | Anonymous   |                 | Infinium chip | SNP         |
| 3414133     | 3          | 30342031 | T                 | G                   | DTY3.1     | Foreground     | Anonymous   |                 | Infinium chip | SNP         |
| 3417192     | 3          | 30457668 | C                 | T                   | DTY3.1     | Foreground     | Anonymous   |                 | Infinium chip | SNP         |
| 3417884     | 3          | 30489032 | T                 | C                   | DTY3.1     | Foreground     | Anonymous   |                 | Infinium chip | SNP         |
| 3419323     | 3          | 30545870 | C                 | T                   | DTY3.1     | Foreground     | Anonymous   |                 | Infinium chip | SNP         |
| 3420460     | 3          | 30604896 | C                 | T                   | DTY3.1     | Foreground     | Anonymous   |                 | Infinium chip | SNP         |
| 3427731     | 3          | 30926534 | T                 | C                   | DTY3.1     | Foreground     | Anonymous   |                 | Infinium chip | SNP         |
| 3429923     | 3          | 31018646 | A                 | C                   | DTY3.1     | Foreground     | Anonymous   |                 | Infinium chip | SNP         |
| 3430019     | 3          | 31025197 | C                 | T                   | DTY3.1     | Foreground     | Anonymous   |                 | Infinium chip | SNP         |
| 3432450     | 3          | 31138388 | G                 | T                   | DTY3.1     | Foreground     | Anonymous   |                 | Infinium chip | SNP         |
| 3433249     | 3          | 31190989 | A                 | G                   | DTY3.1     | Foreground     | Anonymous   |                 | Infinium chip | SNP         |
| 3433307     | 3          | 31196096 | G                 | A                   | DTY3.1     | Foreground     | Anonymous   |                 | Infinium chip | SNP         |
| 3433537     | 3          | 31205828 | C                 | T                   | DTY3.1     | Foreground     | Anonymous   |                 | Infinium chip | SNP         |
| 3437076     | 3          | 31348032 | T                 | C                   | DTY3.1     | Foreground     | Anonymous   |                 | Infinium chip | SNP         |
| 3437919     | 3          | 31373153 | T                 | C                   | DTY3.1     | Foreground     | Anonymous   |                 | Infinium chip | SNP         |
| c3p31393777 | 3          | 31393778 | G                 | A                   | DTY3.1     | Foreground     | Anonymous   |                 | Infinium chip | SNP         |
| id3000019   | 3          | 209351   | C                 | T                   | DTY3.2     | Foreground     | Anonymous   |                 | Infinium chip | SNP         |
| Fd9         | 3          | 1270943  | G                 | A                   | DTY3.2     | Foreground     | Anonymous   | Fingerprinting  | Infinium chip | SNP         |
| id3000913   | 3          | 1670761  | G                 | A                   | DTY3.2     | Foreground     | Anonymous   |                 | Infinium chip | SNP         |
| id3000946   | 3          | 1737794  | C                 | T                   | DTY3.2     | Foreground     | Anonymous   |                 | Infinium chip | SNP         |
| id4000001   | 4          | 59946    | G                 | A                   | DTY4.1     | Foreground     | Anonymous   |                 | Infinium chip | SNP         |
| id4000082   | 4          | 222177   | C                 | A                   | DTY4.1     | Foreground     | Anonymous   |                 | Infinium chip | SNP         |
| 3581003     | 4          | 247628   | G                 | A                   | DTY4.1     | Foreground     | Anonymous   | Fingerprinting  | Infinium chip | SNP         |
| 3581817     | 4          | 263009   | C                 | T                   | DTY4.1     | Foreground     | Anonymous   |                 | Infinium chip | SNP         |

Supplemental Table 4. List of marker positions interrogated for assessing biological accuracy and breeding metrics. All positions are relative to the MSU7 reference genome

| Marker name | Chromosome | Position | Favourable allele | Unfavourable allele | Target QTL | Marker linkage | Specificity | Fingerprinting? | Source        | Marker type |
|-------------|------------|----------|-------------------|---------------------|------------|----------------|-------------|-----------------|---------------|-------------|
| 3581839     | 4          | 264061   | C                 | T                   | DTY4.1     | Foreground     | Anonymous   | Fingerprinting  | Infinium chip | SNP         |
| 3584866     | 4          | 310885   | G                 | A                   | DTY4.1     | Foreground     | Anonymous   |                 | Infinium chip | SNP         |
| 3593929     | 4          | 539827   | G                 | T                   | DTY4.1     | Foreground     | Anonymous   |                 | Infinium chip | SNP         |
| 3597102     | 4          | 603494   | A                 | G                   | DTY4.1     | Foreground     | Anonymous   | Fingerprinting  | Infinium chip | SNP         |
| 3598944     | 4          | 648669   | G                 | A                   | DTY4.1     | Foreground     | Anonymous   |                 | Infinium chip | SNP         |
| 3606371     | 4          | 796549   | T                 | G                   | DTY4.1     | Foreground     | Anonymous   |                 | Infinium chip | SNP         |
| 3610354     | 4          | 910623   | G                 | A                   | DTY4.1     | Foreground     | Anonymous   |                 | Infinium chip | SNP         |
| id4000574   | 4          | 972749   | G                 | T                   | DTY4.1     | Foreground     | Anonymous   |                 | Infinium chip | SNP         |
| id4000585   | 4          | 1022225  | G                 | A                   | DTY4.1     | Foreground     | Anonymous   | Fingerprinting  | Infinium chip | SNP         |
| 3619998     | 4          | 1047515  | A                 | G                   | DTY4.1     | Foreground     | Anonymous   |                 | Infinium chip | SNP         |
| 3623485     | 4          | 1136986  | C                 | T                   | DTY4.1     | Foreground     | Anonymous   | Fingerprinting  | Infinium chip | SNP         |
| 3624428     | 4          | 1158223  | G                 | A                   | DTY4.1     | Foreground     | Anonymous   |                 | Infinium chip | SNP         |
| 3625825     | 4          | 1202031  | C                 | A                   | DTY4.1     | Foreground     | Anonymous   |                 | Infinium chip | SNP         |
| 3629184     | 4          | 1283968  | C                 | T                   | DTY4.1     | Foreground     | Anonymous   |                 | Infinium chip | SNP         |
| 3639669     | 4          | 1540529  | C                 | A                   | DTY4.1     | Foreground     | Anonymous   |                 | Infinium chip | SNP         |
| 3647009     | 4          | 1713004  | A                 | G                   | DTY4.1     | Foreground     | Anonymous   |                 | Infinium chip | SNP         |
| 3647133     | 4          | 1714897  | A                 | G                   | DTY4.1     | Foreground     | Anonymous   |                 | Infinium chip | SNP         |
| 3647336     | 4          | 1718310  | T                 | C                   | DTY4.1     | Foreground     | Anonymous   |                 | Infinium chip | SNP         |
| 3647403     | 4          | 1719865  | C                 | T                   | DTY4.1     | Foreground     | Anonymous   | Fingerprinting  | Infinium chip | SNP         |
| 3655924     | 4          | 1884399  | C                 | T                   | DTY4.1     | Foreground     | Anonymous   |                 | Infinium chip | SNP         |
| 3659698     | 4          | 1961581  | C                 | T                   | DTY4.1     | Foreground     | Anonymous   |                 | Infinium chip | SNP         |
| wd4000229   | 4          | 2032639  | C                 | T                   | DTY4.1     | Foreground     | Anonymous   |                 | Infinium chip | SNP         |
| 3672849     | 4          | 2238213  | G                 | A                   | DTY4.1     | Foreground     | Anonymous   |                 | Infinium chip | SNP         |
| 3674743     | 4          | 2284046  | G                 | A                   | DTY4.1     | Foreground     | Anonymous   |                 | Infinium chip | SNP         |
| 3682819     | 4          | 2394889  | T                 | G                   | DTY4.1     | Foreground     | Anonymous   | Fingerprinting  | Infinium chip | SNP         |
| 3684750     | 4          | 2427802  | A                 | C                   | DTY4.1     | Foreground     | Anonymous   |                 | Infinium chip | SNP         |
| id4001090   | 4          | 2456175  | G                 | A                   | DTY4.1     | Foreground     | Anonymous   |                 | Infinium chip | SNP         |
| id4001113   | 4          | 2484571  | G                 | A                   | DTY4.1     | Foreground     | Anonymous   | Fingerprinting  | Infinium chip | SNP         |
| 3710428     | 4          | 2855673  | G                 | A                   | DTY4.1     | Foreground     | Anonymous   |                 | Infinium chip | SNP         |
| 3745693     | 4          | 3411505  | a                 | c                   | DTY4.1     | Foreground     | Anonymous   |                 | Infinium chip | SNP         |

Supplemental Table 4. List of marker positions interrogated for assessing biological accuracy and breeding metrics. All positions are relative to the MSU7 reference genome

| Marker name | Chromosome | Position | Favourable allele | Unfavourable allele | Target QTL | Marker linkage | Specificity | Fingerprinting? | Source        | Marker type |
|-------------|------------|----------|-------------------|---------------------|------------|----------------|-------------|-----------------|---------------|-------------|
| 8822667     | 8          | 20213731 | A                 | G                   | frg-1      | Foreground     | Anonymous   |                 | Infinium chip | SNP         |
| id8005525   | 8          | 20391635 | G                 | A                   | frg-1      | Foreground     | Anonymous   |                 | Infinium chip | SNP         |
| 8829560     | 8          | 20413803 | G                 | A                   | frg-1      | Foreground     | Anonymous   |                 | Infinium chip | SNP         |
| 163177      | 1          | 5168030  | C                 | T                   | Gn1a       | Foreground     | Anonymous   |                 | Infinium chip | SNP         |
| rd1000052   | 1          | 5210520  | C                 | T                   | Gn1a       | Foreground     | Anonymous   |                 | Infinium chip | SNP         |
| 167505      | 1          | 5324684  | G                 | A                   | Gn1a       | Foreground     | Anonymous   |                 | Infinium chip | SNP         |
| id1004256   | 1          | 5333883  | A                 | G                   | Gn1a       | Foreground     | Anonymous   |                 | Infinium chip | SNP         |
| 173198      | 1          | 5510350  | G                 | T                   | Gn1a       | Foreground     | Anonymous   |                 | Infinium chip | SNP         |
| 176306      | 1          | 5608892  | C                 | T                   | Gn1a       | Foreground     | Anonymous   |                 | Infinium chip | SNP         |
| 2932640     | 3          | 16688962 | A                 | C                   | GS3        | Foreground     | Anonymous   |                 | Infinium chip | SNP         |
| 2934100     | 3          | 16731513 | T                 | C                   | GS3        | Foreground     | Anonymous   |                 | Infinium chip | SNP         |
| wd3000590   | 3          | 16733872 | T                 | G                   | GS3        | Foreground     | Anonymous   |                 | Infinium chip | SNP         |
| 2941650     | 3          | 16889939 | G                 | A                   | GS3        | Foreground     | Anonymous   |                 | Infinium chip | SNP         |
| 6008741     | 6          | 6508525  | G                 | A                   | GT - SSIIa | Foreground     | Anonymous   |                 | Infinium chip | SNP         |
| 6013900     | 6          | 6649871  | T                 | G                   | GT - SSIIa | Foreground     | Anonymous   |                 | Infinium chip | SNP         |
| 6015324     | 6          | 6691213  | T                 | G                   | GT - SSIIa | Foreground     | Anonymous   |                 | Infinium chip | SNP         |
| 6022073     | 6          | 6891960  | A                 | C                   | GT - SSIIa | Foreground     | Anonymous   |                 | Infinium chip | SNP         |
| 4967315     | 5          | 5256714  | C                 | T                   | GW5/SW5    | Foreground     | Anonymous   |                 | Infinium chip | SNP         |
| id5002699   | 5          | 5294341  | T                 | C                   | GW5/SW5    | Foreground     | Anonymous   |                 | Infinium chip | SNP         |
| 4968944     | 5          | 5310401  | G                 | A                   | GW5/SW5    | Foreground     | Anonymous   |                 | Infinium chip | SNP         |
| 4970110     | 5          | 5338205  | T                 | C                   | GW5/SW5    | Foreground     | Anonymous   |                 | Infinium chip | SNP         |
| 4979148     | 5          | 5557745  | G                 | T                   | GW5/SW5    | Foreground     | Anonymous   |                 | Infinium chip | SNP         |
| 4979702     | 5          | 5588965  | T                 | G                   | GW5/SW5    | Foreground     | Anonymous   |                 | Infinium chip | SNP         |
| id3000589   | 3          | 996213   | T                 | G                   | Hd9        | Foreground     | Anonymous   |                 | Infinium chip | SNP         |
| 2506194     | 3          | 1155137  | G                 | T                   | Hd9        | Foreground     | Anonymous   |                 | Infinium chip | SNP         |
| 4298233     | 4          | 17518575 | G                 | A                   | HTSF4.1    | Foreground     | Anonymous   |                 | Infinium chip | SNP         |
| 4299651     | 4          | 17551912 | G                 | A                   | HTSF4.1    | Foreground     | Anonymous   |                 | Infinium chip | SNP         |
| 4303651     | 4          | 17640628 | C                 | T                   | HTSF4.1    | Foreground     | Anonymous   |                 | Infinium chip | SNP         |
| 4304635     | 4          | 17656765 | C                 | T                   | HTSF4.1    | Foreground     | Anonymous   |                 | Infinium chip | SNP         |
| 4312512     | 4          | 17870318 | C                 | T                   | HTSF4.1    | Foreground     | Anonymous   | Fingerprinting  | Infinium chip | SNP         |

Supplemental Table 4. List of marker positions interrogated for assessing biological accuracy and breeding metrics. All positions are relative to the MSU7 reference genome

| Marker name | Chromosome | Position | Favourable allele | Unfavourable allele | Target QTL | Marker linkage | Specificity | Fingerprinting? | Source        | Marker type |
|-------------|------------|----------|-------------------|---------------------|------------|----------------|-------------|-----------------|---------------|-------------|
| 4313620     | 4          | 17891640 | T                 | C                   | HTSF4.1    | Foreground     | Anonymous   |                 | Infinium chip | SNP         |
| 4314701     | 4          | 17911519 | A                 | G                   | HTSF4.1    | Foreground     | Anonymous   | Fingerprinting  | Infinium chip | SNP         |
| rd4001270   | 4          | 18212911 | C                 | T                   | HTSF4.1    | Foreground     | Anonymous   |                 | Infinium chip | SNP         |
| 4329392     | 4          | 18253694 | A                 | G                   | HTSF4.1    | Foreground     | Anonymous   |                 | Infinium chip | SNP         |
| 4331163     | 4          | 18320014 | A                 | C                   | HTSF4.1    | Foreground     | Anonymous   |                 | Infinium chip | SNP         |
| 4333768     | 4          | 18408626 | A                 | C                   | HTSF4.1    | Foreground     | Anonymous   |                 | Infinium chip | SNP         |
| ud4001319   | 4          | 18706317 | G                 | A                   | HTSF4.1    | Foreground     | Anonymous   |                 | Infinium chip | SNP         |
| 4344439     | 4          | 18738202 | C                 | T                   | HTSF4.1    | Foreground     | Anonymous   |                 | Infinium chip | SNP         |
| 4349423     | 4          | 18898900 | A                 | C                   | HTSF4.1    | Foreground     | Anonymous   |                 | Infinium chip | SNP         |
| id2010564   | 2          | 24693023 | A                 | G                   | LTG1       | Foreground     | Anonymous   |                 | Infinium chip | SNP         |
| 2178948     | 2          | 24712704 | G                 | A                   | LTG1       | Foreground     | Anonymous   |                 | Infinium chip | SNP         |
| 2181296     | 2          | 24772301 | A                 | C                   | LTG1       | Foreground     | Anonymous   |                 | Infinium chip | SNP         |
| 2181688     | 2          | 24780754 | A                 | C                   | LTG1       | Foreground     | Anonymous   |                 | Infinium chip | SNP         |
| 4693866     | 4          | 31190068 | G                 | A                   | NAL1       | Foreground     | Anonymous   |                 | Infinium chip | SNP         |
| 4698567     | 4          | 31350359 | T                 | C                   | NAL1       | Foreground     | Anonymous   |                 | Infinium chip | SNP         |
| 4701155     | 4          | 31419137 | C                 | T                   | NAL1       | Foreground     | Anonymous   |                 | Infinium chip | SNP         |
| 8983572     | 8          | 25757847 | T                 | G                   | PGWC8-2    | Foreground     | Anonymous   |                 | Infinium chip | SNP         |
| 8984680     | 8          | 25795906 | G                 | A                   | PGWC8-2    | Foreground     | Anonymous   |                 | Infinium chip | SNP         |
| 8989835     | 8          | 26020138 | T                 | C                   | PGWC8-2    | Foreground     | Anonymous   |                 | Infinium chip | SNP         |
| 8990744     | 8          | 26038950 | G                 | A                   | PGWC8-2    | Foreground     | Anonymous   |                 | Infinium chip | SNP         |
| 8991729     | 8          | 26074700 | A                 | G                   | PGWC8-2    | Foreground     | Anonymous   |                 | Infinium chip | SNP         |
| id1020384   | 1          | 32898485 | G                 | A                   | Pi35(t)    | Foreground     | Anonymous   |                 | Infinium chip | SNP         |
| 1085563     | 1          | 33145570 | T                 | C                   | Pi35(t)    | Foreground     | Anonymous   |                 | Infinium chip | SNP         |
| 1086147     | 1          | 33164035 | G                 | A                   | Pi35(t)    | Foreground     | Anonymous   |                 | Infinium chip | SNP         |
| 1088950     | 1          | 33268652 | A                 | C                   | Pi35(t)    | Foreground     | Anonymous   |                 | Infinium chip | SNP         |
| 1090447     | 1          | 33321905 | G                 | A                   | Pi35(t)    | Foreground     | Anonymous   |                 | Infinium chip | SNP         |
| id11009687  | 11         | 24983484 | A                 | G                   | Pi54       | Foreground     | Anonymous   |                 | Infinium chip | SNP         |
| 11837165    | 11         | 25132894 | G                 | A                   | Pi54       | Foreground     | Anonymous   |                 | Infinium chip | SNP         |
| 11837210    | 11         | 25135188 | G                 | A                   | Pi54       | Foreground     | Anonymous   |                 | Infinium chip | SNP         |
| 11840487    | 11         | 25212665 | T                 | G                   | Pi54       | Foreground     | Anonymous   |                 | Infinium chip | SNP         |

Supplemental Table 4. List of marker positions interrogated for assessing biological accuracy and breeding metrics. All positions are relative to the MSU7 reference genome

| Marker name | Chromosome | Position | Favourable allele | Unfavourable allele | Target QTL | Marker linkage    | Specificity | Fingerprinting? | Source        | Marker type |
|-------------|------------|----------|-------------------|---------------------|------------|-------------------|-------------|-----------------|---------------|-------------|
| 11846033    | 11         | 25359525 | A                 | G                   | Pi54       | Foreground        | Anonymous   |                 | Infinium chip | SNP         |
| 11846268    | 11         | 25368735 | A                 | G                   | Pi54       | Foreground        | Anonymous   |                 | Infinium chip | SNP         |
| 11846273    | 11         | 25369009 | G                 | A                   | Pi54       | Foreground        | Anonymous   |                 | Infinium chip | SNP         |
| id11009984  | 11         | 25432067 | G                 | A                   | Pi54       | Foreground        | Anonymous   |                 | Infinium chip | SNP         |
| 11853141    | 11         | 25531988 | A                 | G                   | Pi54       | Foreground        | Anonymous   |                 | Infinium chip | SNP         |
| 6137646     | 6          | 10049864 | C                 | T                   | Pi9        | Foreground        | Anonymous   |                 | Infinium chip | SNP         |
| 6147112     | 6          | 10199497 | C                 | T                   | Pi9        | Foreground        | Anonymous   |                 | Infinium chip | SNP         |
| 6153803     | 6          | 10395448 | G                 | T                   | Pi9        | Foreground        | Anonymous   |                 | Infinium chip | SNP         |
| 6154651     | 6          | 10418594 | A                 | G                   | Pi9        | Foreground        | Anonymous   |                 | Infinium chip | SNP         |
| 6155433     | 6          | 10438538 | G                 | A                   | Pi9        | Foreground        | Anonymous   |                 | Infinium chip | SNP         |
| 6167468     | 6          | 10677685 | A                 | G                   | Pi9        | Foreground        | Anonymous   |                 | Infinium chip | SNP         |
| 12365900    | 12         | 9762923  | T                 | C                   | Pita2      | Foreground        | Anonymous   |                 | Infinium chip | SNP         |
| 12365932    | 12         | 9763462  | A                 | G                   | Pita2      | Foreground        | Anonymous   |                 | Infinium chip | SNP         |
| 12365977    | 12         | 9764377  | T                 | C                   | Pita2      | Foreground        | Anonymous   |                 | Infinium chip | SNP         |
| 12379451    | 12         | 10051752 | G                 | T                   | Pita2      | Foreground        | Anonymous   |                 | Infinium chip | SNP         |
| 12384668    | 12         | 10148623 | G                 | A                   | Pita2      | Foreground        | Anonymous   |                 | Infinium chip | SNP         |
| 12389497    | 12         | 10228185 | A                 | G                   | Pita2      | Foreground        | Anonymous   |                 | Infinium chip | SNP         |
| 12396903    | 12         | 10395725 | A                 | G                   | Pita2      | Foreground        | Anonymous   |                 | Infinium chip | SNP         |
| id12004047  | 12         | 10469146 | A                 | G                   | Pita2      | Foreground        | Anonymous   |                 | Infinium chip | SNP         |
| 12401704    | 12         | 10509878 | A                 | G                   | Pita2      | Foreground        | Anonymous   |                 | Infinium chip | SNP         |
| 12409876    | 12         | 10671246 | T                 | C                   | Pita2      | Foreground        | Anonymous   |                 | Infinium chip | SNP         |
| 12413246    | 12         | 10740779 | A                 | G                   | Pita2      | Foreground        | Anonymous   |                 | Infinium chip | SNP         |
| 12416805    | 12         | 10810714 | C                 | T                   | Pita2      | Foreground        | Anonymous   |                 | Infinium chip | SNP         |
| id1023347   | 1          | 37030733 | A                 | G                   | qNa1L      | Background-recomb | Anonymous   |                 | Infinium chip | SNP         |
| 1202195     | 1          | 37230818 | T                 | G                   | qNa1L      | Background-recomb | Anonymous   |                 | Infinium chip | SNP         |
| 1203155     | 1          | 37270661 | A                 | C                   | qNa1L      | Background-recomb | Anonymous   |                 | Infinium chip | SNP         |
| 1204367     | 1          | 37332228 | T                 | C                   | qNa1L      | Background-recomb | Anonymous   |                 | Infinium chip | SNP         |
| 1207615     | 1          | 37452003 | T                 | C                   | qNa1L      | Background-recomb | Anonymous   |                 | Infinium chip | SNP         |
| 1211309     | 1          | 37624054 | T                 | C                   | qNa1L      | Background-recomb | Anonymous   |                 | Infinium chip | SNP         |
| 1212226     | 1          | 37676794 | G                 | A                   | qNa1L      | Background-recomb | Anonymous   |                 | Infinium chip | SNP         |



Supplemental Table 4. List of marker positions interrogated for assessing biological accuracy and breeding metrics. All positions are relative to the MSU7 reference genome

| Marker name | Chromosome | Position | Favourable allele | Unfavourable allele | Target QTL | Marker linkage    | Specificity | Fingerprinting? | Source        | Marker type |
|-------------|------------|----------|-------------------|---------------------|------------|-------------------|-------------|-----------------|---------------|-------------|
| 1212517     | 1          | 37692801 | C                 | T                   | qNa1L      | Background-recomb | Anonymous   |                 | Infinium chip | SNP         |
| id1023824   | 1          | 37725124 | T                 | C                   | qNa1L      | Background-recomb | Anonymous   |                 | Infinium chip | SNP         |
| 1213474     | 1          | 37744697 | G                 | A                   | qNa1L      | Background-recomb | Anonymous   |                 | Infinium chip | SNP         |
| 1216964     | 1          | 37877061 | C                 | T                   | qNa1L      | Foreground        | Anonymous   |                 | Infinium chip | SNP         |
| 1217224     | 1          | 37885159 | T                 | C                   | qNa1L      | Foreground        | Anonymous   |                 | Infinium chip | SNP         |
| 1251387     | 1          | 39094696 | C                 | T                   | qNa1L      | Foreground        | Anonymous   |                 | Infinium chip | SNP         |
| 1256276     | 1          | 39244791 | G                 | A                   | qNa1L      | Foreground        | Anonymous   |                 | Infinium chip | SNP         |
| 1257104     | 1          | 39282883 | G                 | A                   | qNa1L      | Foreground        | Anonymous   |                 | Infinium chip | SNP         |
| 1259171     | 1          | 39342234 | G                 | A                   | qNa1L      | Foreground        | Anonymous   |                 | Infinium chip | SNP         |
| 1259861     | 1          | 39362559 | G                 | A                   | qNa1L      | Foreground        | Anonymous   |                 | Infinium chip | SNP         |
| id1024973   | 1          | 39369209 | G                 | A                   | qNa1L      | Foreground        | Anonymous   |                 | Infinium chip | SNP         |
| 1261182     | 1          | 39408253 | T                 | C                   | qNa1L      | Foreground        | Anonymous   |                 | Infinium chip | SNP         |
| 1261519     | 1          | 39420824 | A                 | G                   | qNa1L      | Foreground        | Anonymous   |                 | Infinium chip | SNP         |
| 1264940     | 1          | 39541771 | A                 | C                   | qNa1L      | Foreground        | Anonymous   |                 | Infinium chip | SNP         |
| 1265337     | 1          | 39556216 | A                 | G                   | qNa1L      | Foreground        | Anonymous   |                 | Infinium chip | SNP         |
| 1271624     | 1          | 39791791 | A                 | G                   | qNa1L      | Foreground        | Anonymous   |                 | Infinium chip | SNP         |
| id1025292   | 1          | 39799820 | A                 | C                   | qNa1L      | Foreground        | Anonymous   |                 | Infinium chip | SNP         |
| 1272679     | 1          | 39833556 | C                 | A                   | qNa1L      | Foreground        | Anonymous   |                 | Infinium chip | SNP         |
| id1025367   | 1          | 39878951 | G                 | A                   | qNa1L      | Foreground        | Anonymous   |                 | Infinium chip | SNP         |
| 1275374     | 1          | 39971552 | A                 | C                   | qNa1L      | Foreground        | Anonymous   |                 | Infinium chip | SNP         |
| 1275423     | 1          | 39976095 | C                 | T                   | qNa1L      | Foreground        | Anonymous   |                 | Infinium chip | SNP         |
| id1025455   | 1          | 39993949 | G                 | A                   | qNa1L      | Foreground        | Anonymous   |                 | Infinium chip | SNP         |
| 1277001     | 1          | 40032941 | G                 | T                   | qNa1L      | Foreground        | Anonymous   |                 | Infinium chip | SNP         |
| 1280193     | 1          | 40154802 | G                 | A                   | qNa1L      | Foreground        | Anonymous   |                 | Infinium chip | SNP         |
| 1285866     | 1          | 40398232 | T                 | G                   | qNa1L      | Foreground        | Anonymous   |                 | Infinium chip | SNP         |
| 1286531     | 1          | 40425312 | C                 | T                   | qNa1L      | Foreground        | Anonymous   |                 | Infinium chip | SNP         |
| c1p40455715 | 1          | 40455716 | G                 | A                   | qNa1L      | Foreground        | Anonymous   |                 | Infinium chip | SNP         |
| 1290367     | 1          | 40551798 | G                 | A                   | qNa1L      | Foreground        | Anonymous   |                 | Infinium chip | SNP         |
| 1295108     | 1          | 40729888 | C                 | T                   | qNa1L      | Foreground        | Anonymous   |                 | Infinium chip | SNP         |
| 1303708     | 1          | 40997165 | T                 | C                   | qNa1L      | Foreground        | Anonymous   |                 | Infinium chip | SNP         |

Supplemental Table 4. List of marker positions interrogated for assessing biological accuracy and breeding metrics. All positions are relative to the MSU7 reference genome

| Marker name | Chromosome | Position | Favourable allele | Unfavourable allele | Target QTL | Marker linkage | Specificity | Fingerprinting? | Source        | Marker type |
|-------------|------------|----------|-------------------|---------------------|------------|----------------|-------------|-----------------|---------------|-------------|
| id1007975   | 1          | 11110274 | G                 | A                   | Saltol     | Foreground     | Anonymous   |                 | Infinium chip | SNP         |
| 337593      | 1          | 11160425 | C                 | T                   | Saltol     | Foreground     | Anonymous   |                 | Infinium chip | SNP         |
| id1008171   | 1          | 11527750 | A                 | G                   | Saltol     | Foreground     | Anonymous   |                 | Infinium chip | SNP         |
| 353599      | 1          | 11576126 | G                 | T                   | Saltol     | Foreground     | Anonymous   |                 | Infinium chip | SNP         |
| 357493      | 1          | 11694458 | A                 | G                   | Saltol     | Foreground     | Anonymous   |                 | Infinium chip | SNP         |
| 359469      | 1          | 11739003 | C                 | T                   | Saltol     | Foreground     | Anonymous   |                 | Infinium chip | SNP         |
| 6846895     | 6          | 27371995 | A                 | G                   | SCM2       | Foreground     | Anonymous   | Fingerprinting  | Infinium chip | SNP         |
| 6847831     | 6          | 27401748 | T                 | C                   | SCM2       | Foreground     | Anonymous   |                 | Infinium chip | SNP         |
| 6851172     | 6          | 27505477 | A                 | C                   | SCM2       | Foreground     | Anonymous   |                 | Infinium chip | SNP         |
| 6855107     | 6          | 27609767 | C                 | T                   | SCM2       | Foreground     | Anonymous   |                 | Infinium chip | SNP         |
| 9302663     | 9          | 6191930  | C                 | T                   | Sub1       | Foreground     | Anonymous   | Fingerprinting  | Infinium chip | SNP         |
| 9305671     | 9          | 6257447  | C                 | T                   | Sub1       | Foreground     | Anonymous   |                 | Infinium chip | SNP         |
| 9311693     | 9          | 6360984  | T                 | C                   | Sub1       | Foreground     | Anonymous   |                 | Infinium chip | SNP         |
| 9333955     | 9          | 6774928  | T                 | C                   | Sub1       | Foreground     | Anonymous   |                 | Infinium chip | SNP         |
| 6766696     | 6          | 24875490 | G                 | A                   | TGW6       | Foreground     | Anonymous   |                 | Infinium chip | SNP         |
| 6770053     | 6          | 24965643 | G                 | A                   | TGW6       | Foreground     | Anonymous   |                 | Infinium chip | SNP         |
| 6770789     | 6          | 24994316 | A                 | G                   | TGW6       | Foreground     | Anonymous   |                 | Infinium chip | SNP         |
| id6013421   | 6          | 25026144 | G                 | T                   | TGW6       | Foreground     | Anonymous   |                 | Infinium chip | SNP         |
| id6013529   | 6          | 25148119 | A                 | G                   | TGW6       | Foreground     | Anonymous   |                 | Infinium chip | SNP         |
| 6776685     | 6          | 25185556 | A                 | G                   | TGW6       | Foreground     | Anonymous   |                 | Infinium chip | SNP         |
| 6779108     | 6          | 25277863 | C                 | T                   | TGW6       | Foreground     | Anonymous   |                 | Infinium chip | SNP         |
| 6783797     | 6          | 25387111 | G                 | A                   | TGW6       | Foreground     | Anonymous   |                 | Infinium chip | SNP         |
| 7768382     | 7          | 21998892 | G                 | A                   | TSV1       | Foreground     | Anonymous   |                 | Infinium chip | SNP         |
| 7769958     | 7          | 22042832 | C                 | T                   | TSV1       | Foreground     | Anonymous   |                 | Infinium chip | SNP         |
| 7772481     | 7          | 22126446 | G                 | A                   | TSV1       | Foreground     | Anonymous   |                 | Infinium chip | SNP         |
| id7003748   | 7          | 22277144 | G                 | A                   | TSV1       | Foreground     | Anonymous   |                 | Infinium chip | SNP         |
| 7780169     | 7          | 22381105 | A                 | C                   | TSV1       | Foreground     | Anonymous   |                 | Infinium chip | SNP         |
| 5880441     | 6          | 1928403  | G                 | A                   | Waxy       | Foreground     | Anonymous   |                 | Infinium chip | SNP         |
| 5880574     | 6          | 1934659  | C                 | T                   | Waxy       | Foreground     | Anonymous   |                 | Infinium chip | SNP         |
| id8007210   | 8          | 26316287 | G                 | A                   | xa13       | Foreground     | Anonymous   |                 | Infinium chip | SNP         |

Supplemental Table 4. List of marker positions interrogated for assessing biological accuracy and breeding metrics. All positions are relative to the MSU7 reference genome

| Marker name | Chromosome | Position | Favourable allele | Unfavourable allele | Target QTL | Marker linkage    | Specificity | Fingerprinting? | Source        | Marker type |
|-------------|------------|----------|-------------------|---------------------|------------|-------------------|-------------|-----------------|---------------|-------------|
| 9008641     | 8          | 26709228 | G                 | A                   | xa13       | Foreground        | Anonymous   |                 | Infinium chip | SNP         |
| id8007300   | 8          | 26755059 | A                 | C                   | xa13       | Foreground        | Anonymous   |                 | Infinium chip | SNP         |
| 9010484     | 8          | 26773740 | T                 | G                   | xa13       | Foreground        | Anonymous   |                 | Infinium chip | SNP         |
| 9011188     | 8          | 26805791 | C                 | T                   | xa13       | Foreground        | Anonymous   |                 | Infinium chip | SNP         |
| 9016485     | 8          | 26951088 | C                 | A                   | xa13       | Foreground        | Anonymous   |                 | Infinium chip | SNP         |
| 9021271     | 8          | 27054037 | G                 | T                   | xa13       | Foreground        | Anonymous   |                 | Infinium chip | SNP         |
| 9030959     | 8          | 27300242 | G                 | A                   | xa13       | Foreground        | Anonymous   |                 | Infinium chip | SNP         |
| id11007903  | 11         | 21032445 | G                 | A                   | Xa21       | Foreground        | Anonymous   |                 | Infinium chip | SNP         |
| 11641947    | 11         | 21084315 | A                 | G                   | Xa21       | Foreground        | Anonymous   |                 | Infinium chip | SNP         |
| 11649048    | 11         | 21213958 | A                 | G                   | Xa21       | Foreground        | Anonymous   |                 | Infinium chip | SNP         |
| 11650133    | 11         | 21233762 | C                 | T                   | Xa21       | Foreground        | Anonymous   |                 | Infinium chip | SNP         |
| 11658330    | 11         | 21393571 | G                 | T                   | Xa21       | Foreground        | Anonymous   |                 | Infinium chip | SNP         |
| 11660128    | 11         | 21415415 | C                 | T                   | Xa21       | Foreground        | Anonymous   |                 | Infinium chip | SNP         |
| 11664079    | 11         | 21508416 | G                 | A                   | Xa21       | Foreground        | Anonymous   |                 | Infinium chip | SNP         |
| id11008193  | 11         | 22008834 | T                 | C                   | Xa23       | Foreground        | Anonymous   |                 | Infinium chip | SNP         |
| id11008214  | 11         | 22044151 | T                 | G                   | Xa23       | Foreground        | Anonymous   |                 | Infinium chip | SNP         |
| 11697728    | 11         | 22141169 | G                 | A                   | Xa23       | Foreground        | Anonymous   |                 | Infinium chip | SNP         |
| 11697829    | 11         | 22144940 | G                 | A                   | Xa23       | Foreground        | Anonymous   |                 | Infinium chip | SNP         |
| 11712665    | 11         | 22439562 | A                 | C                   | Xa23       | Foreground        | Anonymous   |                 | Infinium chip | SNP         |
| 11712754    | 11         | 22440795 | G                 | A                   | Xa23       | Foreground        | Anonymous   |                 | Infinium chip | SNP         |
| 11713518    | 11         | 22453819 | T                 | C                   | Xa23       | Foreground        | Anonymous   |                 | Infinium chip | SNP         |
| id11008525  | 11         | 22546707 | A                 | G                   | Xa23       | Foreground        | Anonymous   |                 | Infinium chip | SNP         |
| 11915122    | 11         | 27015384 | A                 | G                   | Xa4        | Background-recomb | Anonymous   |                 | Infinium chip | SNP         |
| 11920440    | 11         | 27163809 | C                 | T                   | Xa4        | Background-recomb | Anonymous   |                 | Infinium chip | SNP         |
| 11933644    | 11         | 27363747 | T                 | C                   | Xa4        | Background-recomb | Anonymous   |                 | Infinium chip | SNP         |
| id11010846  | 11         | 27387727 | A                 | G                   | Xa4        | Background-recomb | Anonymous   |                 | Infinium chip | SNP         |
| 11935925    | 11         | 27408026 | G                 | A                   | Xa4        | Background-recomb | Anonymous   |                 | Infinium chip | SNP         |
| 11945545    | 11         | 27591935 | T                 | G                   | Xa4        | Foreground        | Anonymous   |                 | Infinium chip | SNP         |
| 11955604    | 11         | 27815939 | T                 | G                   | Xa4        | Foreground        | Anonymous   |                 | Infinium chip | SNP         |
| 11955796    | 11         | 27817978 | C                 | T                   | Xa4        | Foreground        | Anonymous   |                 | Infinium chip | SNP         |

Supplemental Table 4. List of marker positions interrogated for assessing biological accuracy and breeding metrics. All positions are relative to the MSU7 reference genome

| Marker name                | Chromosome | Position | Favourable allele | Unfavourable allele | Target QTL | Marker linkage | Specificity    | Fingerprinting? | Source        | Marker type |
|----------------------------|------------|----------|-------------------|---------------------|------------|----------------|----------------|-----------------|---------------|-------------|
| 11963686                   | 11         | 27994133 | T                 | C                   | Xa4        | Foreground     | Anonymous      |                 | Infinium chip | SNP         |
| 11964077                   | 11         | 27998933 | T                 | C                   | Xa4        | Foreground     | Anonymous      |                 | Infinium chip | SNP         |
| 11977172                   | 11         | 28312708 | A                 | G                   | Xa4        | Foreground     | Anonymous      |                 | Infinium chip | SNP         |
| 11979043                   | 11         | 28354517 | A                 | C                   | Xa4        | Foreground     | Anonymous      |                 | Infinium chip | SNP         |
| 11982569                   | 11         | 28437127 | A                 | G                   | Xa4        | Foreground     | Anonymous      |                 | Infinium chip | SNP         |
| 11985463                   | 11         | 28485469 | A                 | G                   | Xa4        | Foreground     | Anonymous      |                 | Infinium chip | SNP         |
| 4813168                    | 5          | 255323   | C                 | T                   | Xa5        | Foreground     | Anonymous      |                 | Infinium chip | SNP         |
| rd5001427                  | 5          | 277001   | G                 | A                   | Xa5        | Foreground     | Anonymous      |                 | Infinium chip | SNP         |
| 4814140                    | 5          | 313688   | G                 | T                   | Xa5        | Foreground     | Anonymous      |                 | Infinium chip | SNP         |
| 4814385                    | 5          | 327023   | A                 | G                   | Xa5        | Foreground     | Anonymous      |                 | Infinium chip | SNP         |
| 4821710                    | 5          | 632216   | T                 | C                   | Xa5        | Foreground     | Anonymous      |                 | Infinium chip | SNP         |
| 4822089                    | 5          | 651569   | A                 | C                   | Xa5        | Foreground     | Anonymous      |                 | Infinium chip | SNP         |
| 4823581                    | 5          | 686650   | G                 | A                   | Xa5        | Foreground     | Anonymous      |                 | Infinium chip | SNP         |
| 4824019                    | 5          | 701470   | C                 | T                   | Xa5        | Foreground     | Anonymous      |                 | Infinium chip | SNP         |
| 4827324                    | 5          | 767585   | A                 | G                   | Xa5        | Foreground     | Anonymous      |                 | Infinium chip | SNP         |
| 6855146                    | 6          | 27612061 | C                 | T                   | Xa7        | Foreground     | Anonymous      | Fingerprinting  | Infinium chip | SNP         |
| id6015793                  | 6          | 27627615 | A                 | C                   | Xa7        | Foreground     | Anonymous      | Fingerprinting  | Infinium chip | SNP         |
| 6859259                    | 6          | 27732310 | A                 | G                   | Xa7        | Foreground     | Anonymous      |                 | Infinium chip | SNP         |
| 6859766                    | 6          | 27761109 | C                 | A                   | Xa7        | Foreground     | Anonymous      |                 | Infinium chip | SNP         |
| 6864051                    | 6          | 27900453 | C                 | T                   | Xa7        | Foreground     | Anonymous      |                 | Infinium chip | SNP         |
| 6869114                    | 6          | 28023780 | C                 | A                   | Xa7        | Foreground     | Anonymous      |                 | Infinium chip | SNP         |
| id6016142                  | 6          | 28061782 | G                 | A                   | Xa7        | Foreground     | Anonymous      |                 | Infinium chip | SNP         |
| MSU7_4_6957474_[G/A]       | 4          | 6957474  | G                 | A                   | BPH17      | Foreground     | Trait-specific | Fingerprinting  | Published     | SNP         |
| MSU7_4_6979033_[G/C]       | 4          | 6979033  | G                 | C                   | BPH17      | Foreground     | Trait-specific | Fingerprinting  | Published     | SNP         |
| Types 5,6,7 (Donors) Pro-1 | 5          | 3339934  | C                 | G                   | Chalk5     | Foreground     | Trait-specific | Fingerprinting  | Published     | SNP         |
| COLD1-jap                  | 4          | 30315214 | T                 | G                   | COLD1      | Foreground     | Trait-specific | Fingerprinting  | Published     | SNP         |
| DEP1-Donor2                | 9          | 16415265 | -1/-638           | 0                   | DEP1       | Foreground     | Trait-specific | Fingerprinting  | Published     | Indel       |
| DTH8-IR24                  | 8          | 4334417  | T                 | -1                  | DTH8       | Foreground     | Trait-specific | Fingerprinting  | Published     | Indel       |
| MSU7_12_17391484_[G/T]     | 12         | 17391484 | T                 | G                   | DTY12.1    | Foreground     | Trait-specific | Fingerprinting  | Published     | SNP         |
| BADH2                      | 8          | 20382857 | -8                | 0                   | frg-1      | Foreground     | Trait-specific | Fingerprinting  | Published     | Indel       |

Supplemental Table 4. List of marker positions interrogated for assessing biological accuracy and breeding metrics. All positions are relative to the MSU7 reference genome

| Marker name              | Chromosome | Position | Favourable allele | Unfavourable allele | Target QTL | Marker linkage | Specificity    | Fingerprinting? | Source    | Marker type |
|--------------------------|------------|----------|-------------------|---------------------|------------|----------------|----------------|-----------------|-----------|-------------|
| MSU7_1_5276521_[T/A]     | 1          | 5276521  | T                 | A                   | Gn1a       | Foreground     | Trait-specific | Fingerprinting  | Published | SNP         |
| MSU7_3_16733441_[T/G]    | 3          | 16733441 | T                 | G                   | GS3        | Foreground     | Trait-specific | Fingerprinting  | Published | SNP         |
| MSU7_6_6752888_[T/C]     | 6          | 6752888  | T                 | C                   | GT - SIIa  | Foreground     | Trait-specific | Fingerprinting  | Published | SNP         |
| MSU7_2_24771726_[T/A]    | 2          | 24771726 | T                 | A                   | LTG1       | Foreground     | Trait-specific | Fingerprinting  | Published | SNP         |
| PGWC8-2_SNP              | 8          | 25894130 | G                 | A                   | PGWC8-2    | Foreground     | Trait-specific | Fingerprinting  | Published | SNP         |
| PGWC8-2_Indel            | 8          | 25897547 | 0                 | +10                 | PGWC8-2    | Foreground     | Trait-specific |                 | Published | SSR         |
| Pi35_E1054D              | 1          | 33144288 | C                 | A                   | Pi35(t)    | Foreground     | Trait-specific | Fingerprinting  | Published | SNP         |
| MSU7_11_25263936_[Indel] | 11         | 25263936 | -34               | 0                   | Pi54       | Foreground     | Trait-specific | Fingerprinting  | Published | Indel       |
| MSU7_12_10607554_[C/A]   | 12         | 10607554 | C                 | A                   | Pita2      | Foreground     | Trait-specific | Fingerprinting  | Published | SNP         |
| Xa13-promoter            | 8          | 26728873 | +~230             | 0                   | xa13       | Foreground     | Trait-specific | Fingerprinting  | Published | Indel       |
| MSU7_5_437499_[A/T]      | 5          | 437499   | A                 | T                   | Xa5        | Foreground     | Trait-specific | Fingerprinting  | Published | SNP         |
| MSU7_5_437500_[G/C]      | 5          | 437500   | G                 | C                   | Xa5        | Foreground     | Trait-specific | Fingerprinting  | Published | SNP         |
| MSU7_9_12131787_[Indel]  | 9          | 12131787 | 0                 | +10                 | AG1        | Foreground     | Trait-specific |                 | This work | Indel       |
| MSU7_9_12131957_[G/A]    | 9          | 12131957 | G                 | A                   | AG1        | Foreground     | Trait-specific | Fingerprinting  | This work | SNP         |
| MSU7_9_12132448_[Indel]  | 9          | 12132448 | -17               | 0                   | AG1        | Foreground     | Trait-specific |                 | This work | Indel       |
| MSU7_9_12154745_[A/C]    | 9          | 12154745 | A                 | C                   | AG1        | Foreground     | Trait-specific |                 | This work | SNP         |
| MSU7_9_12154800_[Indel]  | 9          | 12154800 | -20               | 0                   | AG1        | Foreground     | Trait-specific | Fingerprinting  | This work | Indel       |
| MSU7_9_12206357_[Indel]  | 9          | 12206357 | -38               | 0                   | AG1        | Foreground     | Trait-specific | Fingerprinting  | This work | Indel       |
| MSU7_9_12207504_[A/G]    | 9          | 12207504 | A                 | G                   | AG1        | Foreground     | Trait-specific | Fingerprinting  | This work | SNP         |
| MSU7_9_12215550_[A/G]    | 9          | 12215550 | A                 | G                   | AG1        | Foreground     | Trait-specific |                 | This work | SNP         |
| MSU7_9_12281043_[Indel]  | 9          | 12281043 | 0                 | -30                 | AG1        | Foreground     | Trait-specific |                 | This work | Indel       |
| MSU7_9_12333777_[T/C]    | 9          | 12333777 | C                 | T                   | AG1        | Foreground     | Trait-specific | Fingerprinting  | This work | SNP         |
| MSU7_9_12333815_[Indel]  | 9          | 12333815 | 0                 | -11                 | AG1        | Foreground     | Trait-specific | Fingerprinting  | This work | Indel       |
| MSU7_4_6933648_[Indel]   | 4          | 6933648  | -15               | 0                   | BPH17      | Foreground     | Trait-specific |                 | This work | Indel       |
| MSU7_4_6937106_[Indel]   | 4          | 6937106  | -7                | 0                   | BPH17      | Foreground     | Trait-specific |                 | This work | Indel       |
| MSU7_4_6942449_[T/C]     | 4          | 6942449  | T                 | C                   | BPH17      | Foreground     | Trait-specific | Fingerprinting  | This work | SNP         |
| MSU7_6_1605856_[A/C]     | 6          | 1605856  | A                 | C                   | BPH3       | Foreground     | Trait-specific | Fingerprinting  | This work | SNP         |
| GT 5-2                   | 5          | 3336278  | A                 | C                   | Chalk5     | Foreground     | Trait-specific |                 | This work | SNP         |
| GT 5-1                   | 5          | 3339314  | T                 | G                   | Chalk5     | Foreground     | Trait-specific |                 | This work | SNP         |
| GT 1, 7 Pro-1            | 5          | 3339983  | A                 | G                   | Chalk5     | Foreground     | Trait-specific |                 | This work | SNP         |

Supplemental Table 4. List of marker positions interrogated for assessing biological accuracy and breeding metrics. All positions are relative to the MSU7 reference genome

| Marker name             | Chromosome | Position | Favourable allele | Unfavourable allele | Target QTL | Marker linkage    | Specificity    | Fingerprinting? | Source    | Marker type |
|-------------------------|------------|----------|-------------------|---------------------|------------|-------------------|----------------|-----------------|-----------|-------------|
| GT 1,2,3 Pro-1          | 5          | 3340202  | G                 | A                   | Chalk5     | Foreground        | Trait-specific |                 | This work | SNP         |
| GT 5,6,7 Pro-2          | 5          | 3340204  | A                 | T                   | Chalk5     | Foreground        | Trait-specific |                 | This work | SNP         |
| GT 5,6,7 Pro-3          | 5          | 3340295  | G                 | A                   | Chalk5     | Foreground        | Trait-specific |                 | This work | SNP         |
| GT 5,6,7 Pro-4          | 5          | 3340440  | A                 | G                   | Chalk5     | Foreground        | Trait-specific |                 | This work | SNP         |
| Chalk5_Type-1,7         | 5          | 3340698  | 0                 | -12                 | Chalk5     | Foreground        | Trait-specific |                 | This work | Indel       |
| MSU7_4_29274765_[Indel] | 4          | 29274765 | 0                 | -24                 | COLD1      | Background-recomb | Trait-specific |                 | This work | Indel       |
| MSU7_4_30307709_[Indel] | 4          | 30307709 | 0                 | -8                  | COLD1      | Foreground        | Trait-specific |                 | This work | Indel       |
| MSU7_4_30332386_[Indel] | 4          | 30332386 | 0                 | -9                  | COLD1      | Foreground        | Trait-specific |                 | This work | Indel       |
| MSU7_4_31162689_[Indel] | 4          | 31162689 | 0                 | -17                 | COLD1      | Background-recomb | Trait-specific |                 | This work | Indel       |
| MSU7_9_15278878_[Indel] | 9          | 15278878 | 0                 | -8                  | DEP1       | Background-recomb | Trait-specific |                 | This work | Indel       |
| MSU7_9_16364974_[Indel] | 9          | 16364974 | 0                 | -11                 | DEP1       | Background-recomb | Trait-specific |                 | This work | Indel       |
| MSU7_9_16417966_[Indel] | 9          | 16417966 | 0                 | -11                 | DEP1       | Background-recomb | Trait-specific |                 | This work | Indel       |
| MSU7_9_16948253_[Indel] | 9          | 16948253 | 0                 | -14                 | DEP1       | Background-recomb | Trait-specific |                 | This work | Indel       |
| MSU6_Chr01_37924922     | 1          | 37925965 | G                 | A                   | DTY1.1     | Foreground        | Trait-specific |                 | This work | SNP         |
| MSU7_1_38039503_[Indel] | 1          | 38039503 | -24               | 0                   | DTY1.1     | Foreground        | Trait-specific |                 | This work | Indel       |
| MSU7_1_38073598_[Indel] | 1          | 38073598 | 0                 | -15                 | DTY1.1     | Foreground        | Trait-specific | Fingerprinting  | This work | Indel       |
| MSU7_1_38081544_[G/C]   | 1          | 38081544 | G                 | C                   | DTY1.1     | Foreground        | Trait-specific | Fingerprinting  | This work | SNP         |
| MSU6_1_38455686_[C/A]   | 1          | 38456729 | A                 | C                   | DTY1.1     | Foreground        | Trait-specific |                 | This work | SNP         |
| MSU7_1_38474926_[Indel] | 1          | 38474926 | 0                 | -9                  | DTY1.1     | Foreground        | Trait-specific | Fingerprinting  | This work | Indel       |
| MSU7_1_38652270_[T/C]   | 1          | 38652270 | T                 | C                   | DTY1.1     | Foreground        | Trait-specific | Fingerprinting  | This work | SNP         |
| MSU7_1_38692487_[Indel] | 1          | 38692487 | 0                 | -12                 | DTY1.1     | Foreground        | Trait-specific | Fingerprinting  | This work | Indel       |
| MSU7_1_38843701_[Indel] | 1          | 38843701 | -28               | 0                   | DTY1.1     | Foreground        | Trait-specific |                 | This work | Indel       |
| MSU7_1_38997055_[A/C]   | 1          | 38997055 | A                 | C                   | DTY1.1     | Foreground        | Trait-specific | Fingerprinting  | This work | SNP         |
| MSU7_1_39014751_[A/G]   | 1          | 39014751 | A                 | G                   | DTY1.1     | Foreground        | Trait-specific | Fingerprinting  | This work | SNP         |
| MSU7_1_39227750_[G/A]   | 1          | 39227750 | G                 | A                   | DTY1.1     | Foreground        | Trait-specific |                 | This work | SNP         |
| MSU7_1_39296701_[Indel] | 1          | 39296701 | -31               | 0                   | DTY1.1     | Foreground        | Trait-specific |                 | This work | Indel       |
| MSU7_1_39362114_[Indel] | 1          | 39362114 | -9                | 0                   | DTY1.1     | Foreground        | Trait-specific |                 | This work | Indel       |
| MSU7_1_39534368_[G/A]   | 1          | 39534368 | G                 | A                   | DTY1.1     | Foreground        | Trait-specific | Fingerprinting  | This work | SNP         |
| MSU7_1_39544672_[G/C]   | 1          | 39544672 | C                 | G                   | DTY1.1     | Foreground        | Trait-specific |                 | This work | SNP         |
| MSU7_1_39610271_[G/T]   | 1          | 39610271 | G                 | T                   | DTY1.1     | Foreground        | Trait-specific | Fingerprinting  | This work | SNP         |

Supplemental Table 4. List of marker positions interrogated for assessing biological accuracy and breeding metrics. All positions are relative to the MSU7 reference genome

| Marker name              | Chromosome | Position | Favourable allele | Unfavourable allele | Target QTL | Marker linkage | Specificity    | Fingerprinting? | Source    | Marker type |
|--------------------------|------------|----------|-------------------|---------------------|------------|----------------|----------------|-----------------|-----------|-------------|
| MSU7_1_39799661_[Indel]  | 1          | 39799661 | -15               | 0                   | DTY1.1     | Foreground     | Trait-specific |                 | This work | Indel       |
| MSU7_1_40467064_[T/C]    | 1          | 40467064 | C                 | T                   | DTY1.1     | Foreground     | Trait-specific |                 | This work | SNP         |
| MSU7_12_17354715_[Indel] | 12         | 17354715 | -8                | 0                   | DTY12.1    | Foreground     | Trait-specific | Fingerprinting  | This work | Indel       |
| MSU7_12_17391872_[A/G]   | 12         | 17391872 | A                 | G                   | DTY12.1    | Foreground     | Trait-specific | Fingerprinting  | This work | SNP         |
| MSU7_12_17410887_[Indel] | 12         | 17410887 | -18               | 0                   | DTY12.1    | Foreground     | Trait-specific | Fingerprinting  | This work | Indel       |
| MSU7_2_9600368_[C/T]     | 2          | 9600368  | C                 | T                   | DTY2.1     | Foreground     | Trait-specific | Fingerprinting  | This work | SNP         |
| MSU7_2_9851737_[A/C]     | 2          | 9851737  | A                 | C                   | DTY2.1     | Foreground     | Trait-specific | Fingerprinting  | This work | SNP         |
| MSU7_2_9892764_[G/A]     | 2          | 9892764  | G                 | A                   | DTY2.1     | Foreground     | Trait-specific | Fingerprinting  | This work | SNP         |
| MSU7_2_10003379_[C/A]    | 2          | 10003379 | C                 | A                   | DTY2.1     | Foreground     | Trait-specific | Fingerprinting  | This work | SNP         |
| MSU7_2_10010893_[T/C]    | 2          | 10010893 | C                 | T                   | DTY2.1     | Foreground     | Trait-specific | Fingerprinting  | This work | SNP         |
| MSU7_2_10077216_[G/T]    | 2          | 10077216 | T                 | G                   | DTY2.1     | Foreground     | Trait-specific | Fingerprinting  | This work | SNP         |
| MSU7_2_10182155_[T/C]    | 2          | 10182155 | C                 | T                   | DTY2.1     | Foreground     | Trait-specific | Fingerprinting  | This work | SNP         |
| MSU7_2_10183246_[A/G]    | 2          | 10183246 | A                 | G                   | DTY2.1     | Foreground     | Trait-specific | Fingerprinting  | This work | SNP         |
| MSU7_2_10377052_[A/G]    | 2          | 10377052 | A                 | G                   | DTY2.1     | Foreground     | Trait-specific | Fingerprinting  | This work | SNP         |
| MSU7_2_10640630_[A/G]    | 2          | 10640630 | G                 | A                   | DTY2.1     | Foreground     | Trait-specific | Fingerprinting  | This work | SNP         |
| MSU7_2_10747561_[A/G]    | 2          | 10747561 | A                 | G                   | DTY2.1     | Foreground     | Trait-specific | Fingerprinting  | This work | SNP         |
| MSU7_2_10753821_[A/G]    | 2          | 10753821 | G                 | A                   | DTY2.1     | Foreground     | Trait-specific | Fingerprinting  | This work | SNP         |
| MSU7_2_11015895_[T/A]    | 2          | 11015895 | A                 | T                   | DTY2.1     | Foreground     | Trait-specific | Fingerprinting  | This work | SNP         |
| MSU7_2_11152228_[Indel]  | 2          | 11152228 | -10               | 0                   | DTY2.1     | Foreground     | Trait-specific | Fingerprinting  | This work | Indel       |
| MSU7_2_11153055_[A/T]    | 2          | 11153055 | A                 | T                   | DTY2.1     | Foreground     | Trait-specific | Fingerprinting  | This work | SNP         |
| MSU7_2_11211992_[T/C]    | 2          | 11211992 | T                 | C                   | DTY2.1     | Foreground     | Trait-specific | Fingerprinting  | This work | SNP         |
| MSU7_2_12020819_[C/T]    | 2          | 12020819 | C                 | T                   | DTY2.1     | Foreground     | Trait-specific |                 | This work | SNP         |
| MSU6_2_209765_[G/A]      | 2          | 209765   | G                 | A                   | DTY2.2     | Foreground     | Trait-specific |                 | This work | SNP         |
| MSU6_2_973068_[Indel]    | 2          | 973068   | -14               | 0                   | DTY2.2     | Foreground     | Trait-specific |                 | This work | Indel       |
| MSU7_2_1660713_[C/T]     | 2          | 1660713  | T                 | C                   | DTY2.2     | Foreground     | Trait-specific |                 | This work | SNP         |
| MSU7_2_1678460_[G/A]     | 2          | 1678460  | G                 | A                   | DTY2.2     | Foreground     | Trait-specific |                 | This work | SNP         |
| MSU6_2_2073485_[A/C]     | 2          | 2073485  | C                 | A                   | DTY2.2     | Foreground     | Trait-specific |                 | This work | SNP         |
| MSU7_2_2085377_[G/C]     | 2          | 2085377  | G                 | C                   | DTY2.2     | Foreground     | Trait-specific |                 | This work | SNP         |
| MSU7_2_2092536_[C/T]     | 2          | 2092536  | C                 | T                   | DTY2.2     | Foreground     | Trait-specific |                 | This work | SNP         |
| MSU6_2_2394200_[Indel]   | 2          | 2394200  | 0                 | +11                 | DTY2.2     | Foreground     | Trait-specific |                 | This work | Indel       |

Supplemental Table 4. List of marker positions interrogated for assessing biological accuracy and breeding metrics. All positions are relative to the MSU7 reference genome

| Marker name            | Chromosome | Position | Favourable allele | Unfavourable allele | Target QTL | Marker linkage | Specificity    | Fingerprinting? | Source    | Marker type |
|------------------------|------------|----------|-------------------|---------------------|------------|----------------|----------------|-----------------|-----------|-------------|
| MSU7_2_2542883_[T/A]   | 2          | 2542883  | T                 | A                   | DTY2.2     | Foreground     | Trait-specific | Fingerprinting  | This work | SNP         |
| MSU6_2_2560207_[C/T]   | 2          | 2560207  | T                 | C                   | DTY2.2     | Foreground     | Trait-specific |                 | This work | SNP         |
| MSU6_2_2647007_[Indel] | 2          | 2647009  | -8                | 0                   | DTY2.2     | Foreground     | Trait-specific |                 | This work | Indel       |
| MSU6_2_2777797_[C/T]   | 2          | 2777799  | T                 | C                   | DTY2.2     | Foreground     | Trait-specific |                 | This work | SNP         |
| MSU6_2_2792378_[G/A]   | 2          | 2792380  | A                 | G                   | DTY2.2     | Foreground     | Trait-specific |                 | This work | SNP         |
| MSU7_2_3029440_[T/C]   | 2          | 3029440  | T                 | C                   | DTY2.2     | Foreground     | Trait-specific | Fingerprinting  | This work | SNP         |
| MSU6_2_3192246_[Indel] | 2          | 3192248  | -53               | 0                   | DTY2.2     | Foreground     | Trait-specific |                 | This work | Indel       |
| MSU6_2_3200037_[G/A]   | 2          | 3200039  | A                 | G                   | DTY2.2     | Foreground     | Trait-specific |                 | This work | SNP         |
| MSU6_2_3202243_[Indel] | 2          | 3202245  | -9                | 0                   | DTY2.2     | Foreground     | Trait-specific |                 | This work | Indel       |
| MSU7_2_3597626_[G/C]   | 2          | 3597626  | G                 | C                   | DTY2.2     | Foreground     | Trait-specific | Fingerprinting  | This work | SNP         |
| MSU6_2_3835922_[A/C]   | 2          | 3835925  | C                 | A                   | DTY2.2     | Foreground     | Trait-specific |                 | This work | SNP         |
| MSU6_2_3949702_[Indel] | 2          | 3949705  | 0                 | -13                 | DTY2.2     | Foreground     | Trait-specific |                 | This work | Indel       |
| MSU7_2_4020520_[Indel] | 2          | 4020520  | 0                 | -23                 | DTY2.2     | Foreground     | Trait-specific | Fingerprinting  | This work | Indel       |
| MSU7_2_4038100_[A/T]   | 2          | 4038100  | A                 | T                   | DTY2.2     | Foreground     | Trait-specific |                 | This work | SNP         |
| MSU7_2_4044509_[A/C]   | 2          | 4044509  | A                 | C                   | DTY2.2     | Foreground     | Trait-specific |                 | This work | SNP         |
| MSU6_2_4316330_[T/G]   | 2          | 4316333  | T                 | G                   | DTY2.2     | Foreground     | Trait-specific |                 | This work | SNP         |
| MSU7_2_4565707_[T/C]   | 2          | 4565707  | T                 | C                   | DTY2.2     | Foreground     | Trait-specific |                 | This work | SNP         |
| MSU6_2_4871843_[A/G]   | 2          | 4871846  | A                 | G                   | DTY2.2     | Foreground     | Trait-specific | Fingerprinting  | This work | SNP         |
| MSU6_2_4903393_[C/A]   | 2          | 4903396  | A                 | C                   | DTY2.2     | Foreground     | Trait-specific |                 | This work | SNP         |
| MSU7_2_4943142_[Indel] | 2          | 4943142  | 0                 | -21                 | DTY2.2     | Foreground     | Trait-specific |                 | This work | Indel       |
| MSU7_2_5019293_[T/A]   | 2          | 5019293  | T                 | A                   | DTY2.2     | Foreground     | Trait-specific |                 | This work | SNP         |
| MSU7_2_5021486_[T/C]   | 2          | 5021486  | T                 | C                   | DTY2.2     | Foreground     | Trait-specific |                 | This work | SNP         |
| MSU6_2_5238637_[G/A]   | 2          | 5238640  | A                 | G                   | DTY2.2     | Foreground     | Trait-specific | Fingerprinting  | This work | SNP         |
| MSU6_2_5241905_[Indel] | 2          | 5241908  | -13               | 0                   | DTY2.2     | Foreground     | Trait-specific | Fingerprinting  | This work | Indel       |
| MSU6_2_5275139_[G/A]   | 2          | 5275142  | A                 | G                   | DTY2.2     | Foreground     | Trait-specific |                 | This work | SNP         |
| MSU6_2_5279054_[T/C]   | 2          | 5279057  | C                 | T                   | DTY2.2     | Foreground     | Trait-specific | Fingerprinting  | This work | SNP         |
| MSU6_2_5280764_[Indel] | 2          | 5280767  | 0                 | -24                 | DTY2.2     | Foreground     | Trait-specific |                 | This work | Indel       |
| MSU7_2_5501035_[Indel] | 2          | 5501035  | -10               | 0                   | DTY2.2     | Foreground     | Trait-specific |                 | This work | SNP         |
| MSU7_2_5504975_[G/A]   | 2          | 5504975  | G                 | A                   | DTY2.2     | Foreground     | Trait-specific |                 | This work | SNP         |
| MSU7_2_5515259_[G/T]   | 2          | 5515259  | G                 | T                   | DTY2.2     | Foreground     | Trait-specific | Fingerprinting  | This work | SNP         |



Supplemental Table 4. List of marker positions interrogated for assessing biological accuracy and breeding metrics. All positions are relative to the MSU7 reference genome

| Marker name            | Chromosome | Position | Favourable allele | Unfavourable allele | Target QTL | Marker linkage | Specificity    | Fingerprinting? | Source    | Marker type |
|------------------------|------------|----------|-------------------|---------------------|------------|----------------|----------------|-----------------|-----------|-------------|
| MSU6_2_5688475_[G/A]   | 2          | 5688475  | A                 | G                   | DTY2.2     | Foreground     | Trait-specific | Fingerprinting  | This work | SNP         |
| MSU6_2_5689478_[G/A]   | 2          | 5689478  | A                 | G                   | DTY2.2     | Foreground     | Trait-specific |                 | This work | SNP         |
| MSU6_2_5694476_[Indel] | 2          | 5694476  | 0                 | -10                 | DTY2.2     | Foreground     | Trait-specific |                 | This work | Indel       |
| MSU7_2_6009221_[G/T]   | 2          | 6009221  | G                 | T                   | DTY2.2     | Foreground     | Trait-specific |                 | This work | SNP         |
| MSU7_2_6267235_[C/T]   | 2          | 6267235  | C                 | T                   | DTY2.2     | Foreground     | Trait-specific | Fingerprinting  | This work | SNP         |
| MSU6_2_6587603_[T/G]   | 2          | 6587603  | T                 | G                   | DTY2.2     | Foreground     | Trait-specific |                 | This work | SNP         |
| MSU7_2_6623323_[G/A]   | 2          | 6623323  | G                 | A                   | DTY2.2     | Foreground     | Trait-specific | Fingerprinting  | This work | SNP         |
| MSU7_2_7005817_[T/G]   | 2          | 7005817  | T                 | G                   | DTY2.2     | Foreground     | Trait-specific |                 | This work | SNP         |
| MSU6_2_7485339_[C/T]   | 2          | 7485339  | T                 | C                   | DTY2.2     | Foreground     | Trait-specific | Fingerprinting  | This work | SNP         |
| MSU6_2_7499561_[Indel] | 2          | 7499561  | -10               | 0                   | DTY2.2     | Foreground     | Trait-specific | Fingerprinting  | This work | Indel       |
| MSU6_2_8594377_[Indel] | 2          | 8594377  | 0                 | -21                 | DTY2.2     | Foreground     | Trait-specific |                 | This work | Indel       |
| MSU6_2_8882314_[Indel] | 2          | 8882314  | -9                | 0                   | DTY2.2     | Foreground     | Trait-specific |                 | This work | Indel       |
| MSU6_3_28587948_[G/A]  | 3          | 28587948 | G                 | A                   | DTY3.1     | Foreground     | Trait-specific | Fingerprinting  | This work | SNP         |
| MSU7_3_30047928_[G/A]  | 3          | 30047928 | G                 | A                   | DTY3.1     | Foreground     | Trait-specific | Fingerprinting  | This work | SNP         |
| MSU7_3_30736463_[G/A]  | 3          | 30736463 | G                 | A                   | DTY3.1     | Foreground     | Trait-specific | Fingerprinting  | This work | SNP         |
| MSU7_3_30738342_[C/G]  | 3          | 30738342 | C                 | G                   | DTY3.1     | Foreground     | Trait-specific | Fingerprinting  | This work | SNP         |
| MSU7_3_30742072_[T/G]  | 3          | 30742072 | T                 | G                   | DTY3.1     | Foreground     | Trait-specific | Fingerprinting  | This work | SNP         |
| MSU7_3_30747956_[T/C]  | 3          | 30747956 | T                 | C                   | DTY3.1     | Foreground     | Trait-specific | Fingerprinting  | This work | SNP         |
| MSU7_3_30807050_[G/A]  | 3          | 30807050 | G                 | A                   | DTY3.1     | Foreground     | Trait-specific | Fingerprinting  | This work | SNP         |
| 3_30851172             | 3          | 30858283 | -17               | 0                   | DTY3.1     | Foreground     | Trait-specific | Fingerprinting  | This work | Indel       |
| MSU7_3_30931067_[C/G]  | 3          | 30931067 | C                 | G                   | DTY3.1     | Foreground     | Trait-specific | Fingerprinting  | This work | SNP         |
| MSU7_3_30958327_[G/A]  | 3          | 30958327 | G                 | A                   | DTY3.1     | Foreground     | Trait-specific | Fingerprinting  | This work | SNP         |
| MSU7_3_30960435_[A/G]  | 3          | 30960435 | A                 | G                   | DTY3.1     | Foreground     | Trait-specific | Fingerprinting  | This work | SNP         |
| MSU7_3_30961142_[A/G]  | 3          | 30961142 | A                 | G                   | DTY3.1     | Foreground     | Trait-specific | Fingerprinting  | This work | SNP         |
| MSU7_3_31008659_[C/T]  | 3          | 31008659 | C                 | T                   | DTY3.1     | Foreground     | Trait-specific | Fingerprinting  | This work | SNP         |
| MSU7_3_31016149_[A/G]  | 3          | 31016149 | A                 | G                   | DTY3.1     | Foreground     | Trait-specific | Fingerprinting  | This work | SNP         |
| MSU7_3_31017207_[T/C]  | 3          | 31017207 | T                 | C                   | DTY3.1     | Foreground     | Trait-specific | Fingerprinting  | This work | SNP         |
| MSU7_3_31041777_[A/T]  | 3          | 31041777 | A                 | T                   | DTY3.1     | Foreground     | Trait-specific | Fingerprinting  | This work | SNP         |
| MSU7_3_31050704_[A/G]  | 3          | 31050704 | A                 | G                   | DTY3.1     | Foreground     | Trait-specific | Fingerprinting  | This work | SNP         |
| MSU7_3_31323659_[C/G]  | 3          | 31323659 | C                 | G                   | DTY3.1     | Foreground     | Trait-specific | Fingerprinting  | This work | SNP         |

Supplemental Table 4. List of marker positions interrogated for assessing biological accuracy and breeding metrics. All positions are relative to the MSU7 reference genome

| Marker name            | Chromosome | Position | Favourable allele | Unfavourable allele | Target QTL | Marker linkage | Specificity    | Fingerprinting? | Source    | Marker type |
|------------------------|------------|----------|-------------------|---------------------|------------|----------------|----------------|-----------------|-----------|-------------|
| MSU7_3_31344952_[T/C]  | 3          | 31344952 | T                 | C                   | DTY3.1     | Foreground     | Trait-specific | Fingerprinting  | This work | SNP         |
| MSU6_3_190234_[A/G]    | 3          | 191234   | A                 | G                   | DTY3.2     | Foreground     | Trait-specific |                 | This work | SNP         |
| MSU6_3_798667_[InDel]  | 3          | 799669   | -23               | 0                   | DTY3.2     | Foreground     | Trait-specific |                 | This work | Indel       |
| MSU6_3_804250_[InDel]  | 3          | 805252   | +7                | 0                   | DTY3.2     | Foreground     | Trait-specific |                 | This work | Indel       |
| MSU6_3_807375_[T/C]    | 3          | 808377   | C                 | T                   | DTY3.2     | Foreground     | Trait-specific |                 | This work | SNP         |
| MSU6_3_1292055_[InDel] | 3          | 1293057  | 0                 | -10                 | DTY3.2     | Foreground     | Trait-specific | Fingerprinting  | This work | Indel       |
| MSU6_3_1293822_[InDel] | 3          | 1294824  | -53               | -9                  | DTY3.2     | Foreground     | Trait-specific | Fingerprinting  | This work | Indel       |
| MSU7_3_1295945_[A/G]   | 3          | 1295945  | G                 | A                   | DTY3.2     | Foreground     | Trait-specific | Fingerprinting  | This work | SNP         |
| MSU6_3_1296879_[InDel] | 3          | 1296879  | -29               | 0                   | DTY3.2     | Foreground     | Trait-specific |                 | This work | Indel       |
| MSU7_3_1297998_[G/A]   | 3          | 1297998  | G                 | A                   | DTY3.2     | Foreground     | Trait-specific |                 | This work | SNP         |
| MSU6_3_1829636_[C/T]   | 3          | 1830640  | C                 | T                   | DTY3.2     | Foreground     | Trait-specific |                 | This work | SNP         |
| MSU6_4_89279_[A/T]     | 4          | 90279    | A                 | T                   | DTY4.1     | Foreground     | Trait-specific | Fingerprinting  | This work | SNP         |
| MSU6_4_91491_[G/T]     | 4          | 92491    | G                 | T                   | DTY4.1     | Foreground     | Trait-specific | Fingerprinting  | This work | SNP         |
| MSU6_4_174984_[C/T]    | 4          | 175984   | T                 | C                   | DTY4.1     | Foreground     | Trait-specific | Fingerprinting  | This work | SNP         |
| MSU6_4_196102_[Indel]  | 4          | 197102   | -9                | 0                   | DTY4.1     | Foreground     | Trait-specific | Fingerprinting  | This work | Indel       |
| MSU6_4_221034_[T/C]    | 4          | 222034   | C                 | T                   | DTY4.1     | Foreground     | Trait-specific | Fingerprinting  | This work | SNP         |
| MSU6_4_329380_[T/C]    | 4          | 330380   | C                 | T                   | DTY4.1     | Foreground     | Trait-specific | Fingerprinting  | This work | SNP         |
| MSU6_4_344064_[T/C]    | 4          | 345064   | C                 | T                   | DTY4.1     | Foreground     | Trait-specific | Fingerprinting  | This work | SNP         |
| MSU6_4_482253_[Indel]  | 4          | 483255   | -32               | 0                   | DTY4.1     | Foreground     | Trait-specific | Fingerprinting  | This work | Indel       |
| MSU6_4_483827_[G/T]    | 4          | 484829   | G                 | T                   | DTY4.1     | Foreground     | Trait-specific | Fingerprinting  | This work | SNP         |
| MSU6_4_913761_[A/C]    | 4          | 914761   | C                 | A                   | DTY4.1     | Foreground     | Trait-specific | Fingerprinting  | This work | SNP         |
| MSU6_4_919402_[C/A]    | 4          | 920402   | A                 | C                   | DTY4.1     | Foreground     | Trait-specific |                 | This work | SNP         |
| MSU6_4_1068894_[Indel] | 4          | 1073343  | -10               | 0                   | DTY4.1     | Foreground     | Trait-specific | Fingerprinting  | This work | Indel       |
| MSU6_4_1146119_[C/T]   | 4          | 1150569  | T                 | C                   | DTY4.1     | Foreground     | Trait-specific | Fingerprinting  | This work | SNP         |
| MSU6_4_1329641_[Indel] | 4          | 1334081  | -20               | 0                   | DTY4.1     | Foreground     | Trait-specific | Fingerprinting  | This work | Indel       |
| MSU6_4_1750084_[Indel] | 4          | 1754486  | 0                 | -12                 | DTY4.1     | Foreground     | Trait-specific | Fingerprinting  | This work | Indel       |
| MSU6_4_1965257_[T/C]   | 4          | 1969661  | C                 | T                   | DTY4.1     | Foreground     | Trait-specific | Fingerprinting  | This work | SNP         |
| MSU6_4_1977984_[indel] | 4          | 1982388  | -10               | 0                   | DTY4.1     | Foreground     | Trait-specific | Fingerprinting  | This work | Indel       |
| MSU6_4_2277564_[C/T]   | 4          | 2281969  | T                 | C                   | DTY4.1     | Foreground     | Trait-specific | Fingerprinting  | This work | SNP         |
| MSU6_4_2281606_[Indel] | 4          | 2286011  | -13               | 0                   | DTY4.1     | Foreground     | Trait-specific | Fingerprinting  | This work | Indel       |

Supplemental Table 4. List of marker positions interrogated for assessing biological accuracy and breeding metrics. All positions are relative to the MSU7 reference genome

| Marker name             | Chromosome | Position | Favourable allele | Unfavourable allele | Target QTL | Marker linkage    | Specificity    | Fingerprinting? | Source    | Marker type |
|-------------------------|------------|----------|-------------------|---------------------|------------|-------------------|----------------|-----------------|-----------|-------------|
| MSU6_4_2404881_[C/T]    | 4          | 2409286  | T                 | C                   | DTY4.1     | Foreground        | Trait-specific | Fingerprinting  | This work | SNP         |
| MSU6_4_3553389_[G/A]    | 4          | 3557787  | A                 | G                   | DTY4.1     | Foreground        | Trait-specific |                 | This work | SNP         |
| MSU7_8_20383435_[T/C]   | 8          | 20383435 | T                 | C                   | frg-1      | Foreground        | Trait-specific |                 | This work | SNP         |
| MSU7_1_4949689_[Indel]  | 1          | 4949689  | 0                 | -20                 | Gn1a       | Foreground        | Trait-specific |                 | This work | Indel       |
| MSU7_1_5210929_[Indel]  | 1          | 5210929  | -30               | 0                   | Gn1a       | Foreground        | Trait-specific |                 | This work | Indel       |
| MSU7_1_5413105_[Indel]  | 1          | 5413105  | -18               | 0                   | Gn1a       | Foreground        | Trait-specific |                 | This work | Indel       |
| MSU7_1_5545332_[Indel]  | 1          | 5545332  | -28               | 0                   | Gn1a       | Foreground        | Trait-specific |                 | This work | Indel       |
| MSU7_1_5653351_[Indel]  | 1          | 5653351  | -11               | 0                   | Gn1a       | Background-recomb | Trait-specific |                 | This work | Indel       |
| MSU7_3_16731553_[Indel] | 3          | 16731553 | 0                 | -14                 | GS3        | Foreground        | Trait-specific |                 | This work | Indel       |
| MSU7_3_16733632_[Indel] | 3          | 16733632 | 0                 | +45                 | GS3        | Foreground        | Trait-specific |                 | This work | Indel       |
| MSU7_6_6747818_[Indel]  | 6          | 6747818  | 0                 | -9                  | GT - SSIIa | Foreground        | Trait-specific |                 | This work | Indel       |
| MSU7_6_6748824_[C/G]    | 6          | 6748824  | C                 | G                   | GT - SSIIa | Foreground        | Trait-specific |                 | This work | SNP         |
| MSU7_6_6752357_[A/G]    | 6          | 6752357  | A                 | G                   | GT - SSIIa | Foreground        | Trait-specific |                 | This work | SNP         |
| MSU7_6_6752756_[A/G]    | 6          | 6752756  | A                 | G                   | GT - SSIIa | Foreground        | Trait-specific |                 | This work | SNP         |
| MSU7_6_6754433_[Indel]  | 6          | 6754433  | 0                 | -14                 | GT - SSIIa | Foreground        | Trait-specific |                 | This work | Indel       |
| MSU7_6_6763950_[Indel]  | 6          | 6763950  | 0                 | -18                 | GT - SSIIa | Foreground        | Trait-specific |                 | This work | Indel       |
| MSU7_5_5354753_[Indel]  | 5          | 5354753  | -29               | 0                   | GW5/SW5    | Foreground        | Trait-specific | Fingerprinting  | This work | Indel       |
| MSU7_5_5359425_[A/G]    | 5          | 5359425  | A                 | G                   | GW5/SW5    | Foreground        | Trait-specific |                 | This work | SNP         |
| MSU7_5_5360896_[T/C]    | 5          | 5360896  | T                 | C                   | GW5/SW5    | Foreground        | Trait-specific |                 | This work | SNP         |
| MSU7_5_5361329_[A/G]    | 5          | 5361329  | A                 | G                   | GW5/SW5    | Foreground        | Trait-specific |                 | This work | SNP         |
| MSU7_5_5361420_[Indel]  | 5          | 5361420  | -36               | 0                   | GW5/SW5    | Foreground        | Trait-specific |                 | This work | Indel       |
| 3_1011486               | 3          | 1012487  | -10               | 0                   | Hd9        | Foreground        | Trait-specific |                 | This work | Indel       |
| MSU7_3_1270943_[A/G]    | 3          | 1270943  | G                 | A                   | Hd9        | Foreground        | Trait-specific | Fingerprinting  | This work | SNP         |
| MSU7_3_1271083_[C/T]    | 3          | 1271083  | C                 | T                   | Hd9        | Foreground        | Trait-specific |                 | This work | SNP         |
| MSU6_3_1270081_[T/C]    | 3          | 1271083  | C                 | T                   | Hd9        | Foreground        | Trait-specific |                 | This work | SNP         |
| MSU7_3_1271431_[A/G]    | 3          | 1271431  | A                 | G                   | Hd9        | Foreground        | Trait-specific |                 | This work | SNP         |
| MSU6_3_1270666_[G/C]    | 3          | 1271668  | G                 | C                   | Hd9        | Foreground        | Trait-specific |                 | This work | SNP         |
| MSU7_3_1290074_[T/G]    | 3          | 1290074  | T                 | G                   | Hd9        | Foreground        | Trait-specific |                 | This work | SNP         |
| MSU6_3_1289949_[InDel]  | 3          | 1290947  | -16               | 0                   | Hd9        | Foreground        | Trait-specific |                 | This work | Indel       |
| 3_1850409               | 3          | 1851409  | -16               | 0                   | Hd9        | Foreground        | Trait-specific |                 | This work | Indel       |

Supplemental Table 4. List of marker positions interrogated for assessing biological accuracy and breeding metrics. All positions are relative to the MSU7 reference genome

| Marker name             | Chromosome | Position | Favourable allele | Unfavourable allele | Target QTL | Marker linkage | Specificity    | Fingerprinting? | Source    | Marker type |
|-------------------------|------------|----------|-------------------|---------------------|------------|----------------|----------------|-----------------|-----------|-------------|
| MSU6_4_17302271_[Indel] | 4          | 17474229 | 0                 | -22                 | HTSF4.1    | Foreground     | Trait-specific | Fingerprinting  | This work | Indel       |
| MSU6_4_17306068_[Indel] | 4          | 17478038 | 0                 | +17                 | HTSF4.1    | Foreground     | Trait-specific | Fingerprinting  | This work | SSR         |
| MSU6_4_17313683_[Indel] | 4          | 17485641 | 0                 | -11                 | HTSF4.1    | Foreground     | Trait-specific |                 | This work | Indel       |
| MSU6_4_17414046_[Indel] | 4          | 17586003 | -17               | 0                   | HTSF4.1    | Foreground     | Trait-specific |                 | This work | Indel       |
| MSU6_4_17432397_[Indel] | 4          | 17604356 | 0                 | +34                 | HTSF4.1    | Foreground     | Trait-specific | Fingerprinting  | This work | Indel       |
| MSU6_4_17434648_[Indel] | 4          | 17606607 | +>30              | 0                   | HTSF4.1    | Foreground     | Trait-specific |                 | This work | Indel       |
| MSU6_4_17482836_[Indel] | 4          | 17654795 | -83               | 0                   | HTSF4.1    | Foreground     | Trait-specific | Fingerprinting  | This work | Indel       |
| MSU6_4_17485204_[Indel] | 4          | 17657163 | -27               | 0                   | HTSF4.1    | Foreground     | Trait-specific |                 | This work | Indel       |
| MSU6_4_17495280_[Indel] | 4          | 17667229 | 0                 | +15                 | HTSF4.1    | Foreground     | Trait-specific | Fingerprinting  | This work | Indel       |
| Heat_85                 | 4          | 17671097 | A                 | T                   | HTSF4.1    | Foreground     | Trait-specific | Fingerprinting  | This work | SNP         |
| MSU6_4_17719426_[Indel] | 4          | 17891385 | 0                 | -15                 | HTSF4.1    | Foreground     | Trait-specific | Fingerprinting  | This work | Indel       |
| MSU6_4_17987548_[Indel] | 4          | 18159482 | 0                 | -22                 | HTSF4.1    | Foreground     | Trait-specific | Fingerprinting  | This work | Indel       |
| MSU6_4_17996441_[Indel] | 4          | 18168397 | 0                 | +>40                | HTSF4.1    | Foreground     | Trait-specific | Fingerprinting  | This work | Indel       |
| Heat_88                 | 4          | 18172991 | C                 | G                   | HTSF4.1    | Foreground     | Trait-specific | Fingerprinting  | This work | SNP         |
| MSU6_4_18081825_[Indel] | 4          | 18253779 | 0                 | +11                 | HTSF4.1    | Foreground     | Trait-specific |                 | This work | Indel       |
| MSU6_4_18231862_[Indel] | 4          | 18403817 | 0                 | -42                 | HTSF4.1    | Foreground     | Trait-specific |                 | This work | Indel       |
| MSU6_4_18241283_[Indel] | 4          | 18413238 | 0                 | -7                  | HTSF4.1    | Foreground     | Trait-specific | Fingerprinting  | This work | Indel       |
| MSU6_4_18349442_[Indel] | 4          | 18521397 | -16               | 0                   | HTSF4.1    | Foreground     | Trait-specific |                 | This work | Indel       |
| MSU6_4_18353408_[Indel] | 4          | 18525363 | 0                 | -8                  | HTSF4.1    | Foreground     | Trait-specific | Fingerprinting  | This work | Indel       |
| MSU6_4_18434206_[Indel] | 4          | 18606160 | -34               | 0                   | HTSF4.1    | Foreground     | Trait-specific | Fingerprinting  | This work | Indel       |
| Heat_81                 | 4          | 18775374 | G                 | A                   | HTSF4.1    | Foreground     | Trait-specific |                 | This work | SNP         |
| MSU6_4_19012894_[Indel] | 4          | 19184854 | 0                 | -17                 | HTSF4.1    | Foreground     | Trait-specific |                 | This work | Indel       |
| MSU6_4_19049581_[Indel] | 4          | 19221545 | 0                 | -11                 | HTSF4.1    | Foreground     | Trait-specific |                 | This work | Indel       |
| MSU6_4_19431105_[Indel] | 4          | 19603067 | 0                 | -20                 | HTSF4.1    | Foreground     | Trait-specific |                 | This work | Indel       |
| MSU6_4_19698160_[Indel] | 4          | 19870124 | -8                | 0                   | HTSF4.1    | Foreground     | Trait-specific |                 | This work | Indel       |
| MSU6_4_19700450_[Indel] | 4          | 19872414 | 0                 | +21                 | HTSF4.1    | Foreground     | Trait-specific |                 | This work | Indel       |
| MSU6_4_19713054_[Indel] | 4          | 19885018 | -4                | 0                   | HTSF4.1    | Foreground     | Trait-specific |                 | This work | SSR         |
| MSU6_4_19713669_[Indel] | 4          | 19885633 | 0                 | -220                | HTSF4.1    | Foreground     | Trait-specific |                 | This work | Indel       |
| MSU6_4_19744053_[Indel] | 4          | 19916017 | 0                 | +26                 | HTSF4.1    | Foreground     | Trait-specific |                 | This work | Indel       |
| MSU6_4_19968600_[Indel] | 4          | 20140560 | 0                 | -7                  | HTSF4.1    | Foreground     | Trait-specific |                 | This work | Indel       |

Supplemental Table 4. List of marker positions interrogated for assessing biological accuracy and breeding metrics. All positions are relative to the MSU7 reference genome

| Marker name              | Chromosome | Position | Favourable allele | Unfavourable allele | Target QTL | Marker linkage    | Specificity    | Fingerprinting? | Source    | Marker type |
|--------------------------|------------|----------|-------------------|---------------------|------------|-------------------|----------------|-----------------|-----------|-------------|
| MSU6_4_19977796_[Indel]  | 4          | 20149751 | 0                 | -24                 | HTSF4.1    | Foreground        | Trait-specific |                 | This work | Indel       |
| MSU7_2_24735311_[Indel]  | 2          | 24735311 | 0                 | -18                 | LTG1       | Foreground        | Trait-specific | Fingerprinting  | This work | Indel       |
| MSU7_4_30376012_[Indel]  | 4          | 30376012 | 0                 | -22                 | NAL1       | Foreground        | Trait-specific |                 | This work | Indel       |
| MSU6_4_31027691[G/A]     | 4          | 31212801 | A                 | G                   | NAL1       | Foreground        | Trait-specific | Fingerprinting  | This work | SNP         |
| MSU7_4_31358376_[Indel]  | 4          | 31358376 | 0                 | -11                 | NAL1       | Background-recomb | Trait-specific |                 | This work | Indel       |
| MSU7_8_24789321_[Indel]  | 8          | 24789321 | 0                 | -14                 | PGWC8-2    | Background-recomb | Trait-specific |                 | This work | Indel       |
| MSU7_8_25891190_[Indel]  | 8          | 25891190 | 0                 | -14                 | PGWC8-2    | Foreground        | Trait-specific |                 | This work | Indel       |
| MSU7_8_25901566_[Indel]  | 8          | 25901566 | 0                 | -10                 | PGWC8-2    | Foreground        | Trait-specific |                 | This work | Indel       |
| MSU7_8_25977796_[Indel]  | 8          | 25977796 | 0                 | -11                 | PGWC8-2    | Foreground        | Trait-specific |                 | This work | Indel       |
| MSU7_8_26171338_[Indel]  | 8          | 26171338 | 0                 | -27                 | PGWC8-2    | Background-recomb | Trait-specific |                 | This work | Indel       |
| MSU7_1_32975144_[Indel]  | 1          | 32975144 | 0                 | -21                 | Pi35(t)    | Foreground        | Trait-specific |                 | This work | Indel       |
| MSU7_1_33075210_[Indel]  | 1          | 33075210 | 0                 | -6                  | Pi35(t)    | Foreground        | Trait-specific |                 | This work | Indel       |
| Pi35_R1056S              | 1          | 33144294 | T                 | A                   | Pi35(t)    | Foreground        | Trait-specific |                 | This work | SNP         |
| Pi35_Q1073P              | 1          | 33144344 | C                 | A                   | Pi35(t)    | Foreground        | Trait-specific |                 | This work | SNP         |
| MSU7_1_33145816_[Indel]  | 1          | 33145816 | 0                 | -7                  | Pi35(t)    | Foreground        | Trait-specific |                 | This work | Indel       |
| MSU7_1_33177564_[Indel]  | 1          | 33177564 | +>50              | 0                   | Pi35(t)    | Foreground        | Trait-specific |                 | This work | Indel       |
| MSU7_1_33182396_[Indel]  | 1          | 33182396 | 0                 | -15                 | Pi35(t)    | Foreground        | Trait-specific |                 | This work | Indel       |
| MSU7_1_33202058_[Indel]  | 1          | 33202058 | -9                | 0                   | Pi35(t)    | Foreground        | Trait-specific |                 | This work | Indel       |
| MSU7_1_33246278_[Indel]  | 1          | 33246278 | +13               | 0                   | Pi35(t)    | Foreground        | Trait-specific |                 | This work | Indel       |
| MSU7_1_33260985_[Indel]  | 1          | 33260985 | 0                 | -11                 | Pi35(t)    | Foreground        | Trait-specific |                 | This work | Indel       |
| MSU7_11_24998256_[C/T]   | 11         | 24998256 | C                 | T                   | Pi54       | Background-recomb | Trait-specific |                 | This work | SNP         |
| MSU7_11_25021561_[C/T]   | 11         | 25021561 | C                 | T                   | Pi54       | Background-recomb | Trait-specific |                 | This work | SNP         |
| MSU7_11_25040709_[Indel] | 11         | 25040709 | 0                 | -10                 | Pi54       | Background-recomb | Trait-specific |                 | This work | Indel       |
| MSU7_11_25040957_[G/T]   | 11         | 25040957 | G                 | T                   | Pi54       | Background-recomb | Trait-specific |                 | This work | SNP         |
| MSU7_11_25121364_[Indel] | 11         | 25121364 | 0                 | -38                 | Pi54       | Background-recomb | Trait-specific |                 | This work | Indel       |
| MSU7_11_25160969_[T/C]   | 11         | 25160969 | T                 | C                   | Pi54       | Foreground        | Trait-specific |                 | This work | SNP         |
| MSU7_11_25161698_[G/A]   | 11         | 25161698 | G                 | A                   | Pi54       | Foreground        | Trait-specific |                 | This work | SNP         |
| MSU7_11_25174345_[Indel] | 11         | 25174345 | -10               | 0                   | Pi54       | Foreground        | Trait-specific |                 | This work | Indel       |
| MSU7_11_25194916_[Indel] | 11         | 25194916 | 0                 | -9                  | Pi54       | Foreground        | Trait-specific |                 | This work | Indel       |
| MSU7_11_25203227_[Indel] | 11         | 25203227 | 0                 | -10                 | Pi54       | Foreground        | Trait-specific |                 | This work | Indel       |

Supplemental Table 4. List of marker positions interrogated for assessing biological accuracy and breeding metrics. All positions are relative to the MSU7 reference genome

| Marker name              | Chromosome | Position | Favourable allele | Unfavourable allele | Target QTL | Marker linkage    | Specificity    | Fingerprinting? | Source    | Marker type |
|--------------------------|------------|----------|-------------------|---------------------|------------|-------------------|----------------|-----------------|-----------|-------------|
| MSU7_11_25203532_[A/T]   | 11         | 25203532 | A                 | T                   | Pi54       | Foreground        | Trait-specific |                 | This work | SNP         |
| MSU7_11_25208829_[Indel] | 11         | 25208829 | -10               | 0                   | Pi54       | Foreground        | Trait-specific |                 | This work | Indel       |
| MSU7_11_25264060_[G/A]   | 11         | 25264060 | G                 | A                   | Pi54       | Foreground        | Trait-specific |                 | This work | SNP         |
| MSU7_11_25400634_[Indel] | 11         | 25400634 | 0                 | -21                 | Pi54       | Foreground        | Trait-specific |                 | This work | Indel       |
| MSU7_11_25478473_[Indel] | 11         | 25478473 | -12               | 0                   | Pi54       | Foreground        | Trait-specific |                 | This work | Indel       |
| MSU7_11_25495115_[Indel] | 11         | 25495115 | 0                 | -13                 | Pi54       | Foreground        | Trait-specific |                 | This work | Indel       |
| MSU7_11_25517720_[Indel] | 11         | 25517720 | -7                | 0                   | Pi54       | Foreground        | Trait-specific |                 | This work | Indel       |
| MSU7_11_25550877_[Indel] | 11         | 25550877 | +30               | 0                   | Pi54       | Background-recomb | Trait-specific |                 | This work | Indel       |
| MSU7_11_25566130_[Indel] | 11         | 25566130 | -15               | 0                   | Pi54       | Background-recomb | Trait-specific |                 | This work | Indel       |
| MSU7_11_25592940_[Indel] | 11         | 25592940 | -27               | 0                   | Pi54       | Background-recomb | Trait-specific |                 | This work | Indel       |
| MSU7_11_25594012_[Indel] | 11         | 25594012 | +18               | 0                   | Pi54       | Background-recomb | Trait-specific |                 | This work | Indel       |
| MSU7_11_25600423_[Indel] | 11         | 25600423 | -8                | 0                   | Pi54       | Background-recomb | Trait-specific |                 | This work | Indel       |
| MSU7_11_26311147_[G/T]   | 11         | 26311147 | G                 | T                   | Pi54       | Background-recomb | Trait-specific |                 | This work | SNP         |
| MSU7_6_10198122_[A/C]    | 6          | 10198122 | C                 | A                   | Pi9        | Background-recomb | Trait-specific |                 | This work | SNP         |
| MSU7_6_10381396_[A/G]    | 6          | 10381396 | A                 | G                   | Pi9        | Foreground        | Trait-specific |                 | This work | SNP         |
| MSU7_6_10381489_[Indel]  | 6          | 10381489 | -10               | 0                   | Pi9        | Foreground        | Trait-specific | Fingerprinting  | This work | Indel       |
| MSU7_6_10381570_[A/C]    | 6          | 10381570 | A                 | C                   | Pi9        | Foreground        | Trait-specific |                 | This work | SNP         |
| MSU7_6_10381589_[T/C]    | 6          | 10381589 | T                 | C                   | Pi9        | Foreground        | Trait-specific |                 | This work | SNP         |
| MSU7_6_10381880_[C/T]    | 6          | 10381880 | C                 | T                   | Pi9        | Foreground        | Trait-specific |                 | This work | SNP         |
| MSU7_6_10383378_[C/T]    | 6          | 10383378 | T                 | C                   | Pi9        | Foreground        | Trait-specific |                 | This work | SNP         |
| MSU7_6_10388025_[T/A]    | 6          | 10388025 | T                 | A                   | Pi9        | Foreground        | Trait-specific |                 | This work | SNP         |
| MSU7_6_10389274_[A/C]    | 6          | 10389274 | A                 | C                   | Pi9        | Foreground        | Trait-specific |                 | This work | SNP         |
| MSU7_6_10389352_[A/T]    | 6          | 10389352 | A                 | T                   | Pi9        | Foreground        | Trait-specific |                 | This work | SNP         |
| MSU7_6_10389610_[C/G]    | 6          | 10389610 | C                 | G                   | Pi9        | Foreground        | Trait-specific |                 | This work | SNP         |
| MSU7_6_10389633_[C/G]    | 6          | 10389633 | C                 | G                   | Pi9        | Foreground        | Trait-specific |                 | This work | SNP         |
| MSU7_6_10390099_[C/A]    | 6          | 10390099 | C                 | A                   | Pi9        | Foreground        | Trait-specific |                 | This work | SNP         |
| MSU7_6_10711621_[A/T]    | 6          | 10711621 | A                 | T                   | Pi9        | Background-recomb | Trait-specific |                 | This work | SNP         |
| MSU7_6_10807099_[T/C]    | 6          | 10807099 | T                 | C                   | Pi9        | Background-recomb | Trait-specific |                 | This work | SNP         |
| MSU7_6_10960628_[C/T]    | 6          | 10960628 | C                 | T                   | Pi9        | Background-recomb | Trait-specific |                 | This work | SNP         |
| MSU7_12_9177624_[Indel]  | 12         | 9177624  | -26               | 0                   | Pita2      | Foreground        | Trait-specific |                 | This work | SNP         |

Supplemental Table 4. List of marker positions interrogated for assessing biological accuracy and breeding metrics. All positions are relative to the MSU7 reference genome

| Marker name              | Chromosome | Position | Favourable allele | Unfavourable allele | Target QTL | Marker linkage    | Specificity    | Fingerprinting? | Source    | Marker type |
|--------------------------|------------|----------|-------------------|---------------------|------------|-------------------|----------------|-----------------|-----------|-------------|
| MSU7_12_9893146_[A/G]    | 12         | 9893146  | A                 | G                   | Pita2      | Foreground        | Trait-specific |                 | This work | SNP         |
| MSU7_12_9996103_[Indel]  | 12         | 9996103  | +>40              | 0                   | Pita2      | Foreground        | Trait-specific |                 | This work | Indel       |
| MSU7_12_10177640_[A/G]   | 12         | 10177640 | A                 | G                   | Pita2      | Foreground        | Trait-specific |                 | This work | SNP         |
| MSU7_12_10188917_[Indel] | 12         | 10188917 | -9                | 0                   | Pita2      | Foreground        | Trait-specific |                 | This work | Indel       |
| MSU7_12_10302339_[Indel] | 12         | 10302339 | +21               | 0                   | Pita2      | Foreground        | Trait-specific |                 | This work | Indel       |
| MSU7_12_10423020_[T/C]   | 12         | 10423020 | C                 | T                   | Pita2      | Foreground        | Trait-specific |                 | This work | SNP         |
| MSU7_12_10451426_[Indel] | 12         | 10451426 | -21               | 0                   | Pita2      | Foreground        | Trait-specific |                 | This work | Indel       |
| MSU7_12_10508210_[Indel] | 12         | 10508210 | -23               | 0                   | Pita2      | Foreground        | Trait-specific |                 | This work | Indel       |
| MSU7_12_10531640_[Indel] | 12         | 10531640 | -21               | 0                   | Pita2      | Foreground        | Trait-specific |                 | This work | Indel       |
| MSU7_12_10612782_[Indel] | 12         | 10612782 | +>40              | 0                   | Pita2      | Foreground        | Trait-specific | Fingerprinting  | This work | Indel       |
| MSU7_12_10697197_[Indel] | 12         | 10697197 | -11               | 0                   | Pita2      | Foreground        | Trait-specific |                 | This work | Indel       |
| MSU7_12_10774796_[G/C]   | 12         | 10774796 | G                 | C                   | Pita2      | Foreground        | Trait-specific |                 | This work | SNP         |
| MSU7_12_10853832_[Indel] | 12         | 10853832 | -30               | 0/-11               | Pita2      | Foreground        | Trait-specific |                 | This work | Indel       |
| MSU7_12_11069613_[Indel] | 12         | 11069613 | -11               | 0                   | Pita2      | Foreground        | Trait-specific |                 | This work | Indel       |
| MSU6_1_34198604_[Indel]  | 1          | 34199640 | -11               | 0                   | qNa1L      | Background-recomb | Trait-specific |                 | This work | Indel       |
| MSU6_Chr01_37175070      | 1          | 37176113 | T                 | G                   | qNa1L      | Background-recomb | Trait-specific |                 | This work | SNP         |
| MSU6_1_37237133_[Indel]  | 1          | 37238176 | 0                 | -13                 | qNa1L      | Background-recomb | Trait-specific |                 | This work | Indel       |
| JDP_Chr01_37332506       | 1          | 37333549 | C                 | T                   | qNa1L      | Background-recomb | Trait-specific |                 | This work | SNP         |
| JDP_Chr01_37335900       | 1          | 37336943 | G                 | T                   | qNa1L      | Background-recomb | Trait-specific |                 | This work | SNP         |
| MSU6_Chr01_37363350      | 1          | 37364393 | C                 | G                   | qNa1L      | Background-recomb | Trait-specific |                 | This work | SNP         |
| MSU6_1_37415864_[Indel]  | 1          | 37416907 | -43               | 0                   | qNa1L      | Background-recomb | Trait-specific |                 | This work | Indel       |
| MSU6_1_37541965_[Indel]  | 1          | 37543008 | -12               | 0                   | qNa1L      | Background-recomb | Trait-specific |                 | This work | Indel       |
| MSU6_1_37579406_[Indel]  | 1          | 37580449 | +7                | 0                   | qNa1L      | Background-recomb | Trait-specific |                 | This work | Indel       |
| MSU6_1_37588170_[Indel]  | 1          | 37589213 | 0                 | +12                 | qNa1L      | Background-recomb | Trait-specific |                 | This work | Indel       |
| MSU6_1_37698557_[Indel]  | 1          | 37699597 | 0                 | -16                 | qNa1L      | Background-recomb | Trait-specific |                 | This work | Indel       |
| MSU6_1_37724349_[Indel]  | 1          | 37725392 | -7                | 0                   | qNa1L      | Background-recomb | Trait-specific |                 | This work | Indel       |
| MSU6_1_37781439_[G/A]    | 1          | 37782482 | A                 | G                   | qNa1L      | Foreground        | Trait-specific | Fingerprinting  | This work | SNP         |
| MSU6_1_37796891_[Indel]  | 1          | 37797934 | -12               | 0                   | qNa1L      | Foreground        | Trait-specific | Fingerprinting  | This work | Indel       |
| MSU6_Chr01_37804554      | 1          | 37805597 | C                 | A                   | qNa1L      | Foreground        | Trait-specific |                 | This work | SNP         |
| MSU6_1_37903562_[Indel]  | 1          | 37904605 | GATAAAGA          | G                   | qNa1L      | Foreground        | Trait-specific |                 | This work | Indel       |

Supplemental Table 4. List of marker positions interrogated for assessing biological accuracy and breeding metrics. All positions are relative to the MSU7 reference genome

| Marker name             | Chromosome | Position | Favourable allele | Unfavourable allele | Target QTL | Marker linkage    | Specificity    | Fingerprinting? | Source    | Marker type |
|-------------------------|------------|----------|-------------------|---------------------|------------|-------------------|----------------|-----------------|-----------|-------------|
| MSU6_1_37918160_[Indel] | 1          | 37919203 | 0                 | -14                 | qNa1L      | Foreground        | Trait-specific |                 | This work | Indel       |
| MSU7_1_39300173_[Indel] | 1          | 39300173 | -17               | 0                   | qNa1L      | Foreground        | Trait-specific |                 | This work | Indel       |
| MSU6_Chr01_39312420     | 1          | 39313463 | A                 | G                   | qNa1L      | Foreground        | Trait-specific |                 | This work | SNP         |
| MSU7_1_39400936_[Indel] | 1          | 39400936 | 0                 | -21                 | qNa1L      | Foreground        | Trait-specific |                 | This work | Indel       |
| MSU7_1_39500179_[Indel] | 1          | 39500179 | 0                 | -8                  | qNa1L      | Foreground        | Trait-specific |                 | This work | Indel       |
| 1_39501901              | 1          | 39502944 | -32               | 0                   | qNa1L      | Foreground        | Trait-specific |                 | This work | Indel       |
| MSU7_1_39708933_[Indel] | 1          | 39708933 | -7                | 0                   | qNa1L      | Foreground        | Trait-specific |                 | This work | Indel       |
| MSU6_Chr01_39795221     | 1          | 39796264 | G                 | A                   | qNa1L      | Foreground        | Trait-specific |                 | This work | SNP         |
| MSU6_1_39825482_[T/C]   | 1          | 39826525 | C                 | T                   | qNa1L      | Foreground        | Trait-specific | Fingerprinting  | This work | SNP         |
| MSU7_1_39875419_[Indel] | 1          | 39875419 | 0                 | -12                 | qNa1L      | Foreground        | Trait-specific |                 | This work | Indel       |
| MSU6_Chr01_39886164     | 1          | 39887207 | A                 | G                   | qNa1L      | Foreground        | Trait-specific |                 | This work | SNP         |
| MSU7_1_39907622_[Indel] | 1          | 39907622 | -5                | 0                   | qNa1L      | Foreground        | Trait-specific |                 | This work | Indel       |
| MSU7_1_39975106_[Indel] | 1          | 39975106 | 0                 | -36                 | qNa1L      | Foreground        | Trait-specific |                 | This work | Indel       |
| MSU7_1_40322404_[Indel] | 1          | 40322404 | -11               | 0                   | qNa1L      | Foreground        | Trait-specific |                 | This work | Indel       |
| MSU6_1_40361915_[G/A]   | 1          | 40362958 | A                 | G                   | qNa1L      | Foreground        | Trait-specific | Fingerprinting  | This work | SNP         |
| MSU7_1_40371714_[Indel] | 1          | 40371714 | -20               | 0                   | qNa1L      | Foreground        | Trait-specific | Fingerprinting  | This work | Indel       |
| MSU7_1_40406873_[T/C]   | 1          | 40406873 | T                 | C                   | qNa1L      | Foreground        | Trait-specific | Fingerprinting  | This work | SNP         |
| MSU7_1_40410995_[Indel] | 1          | 40410995 | +13               | 0                   | qNa1L      | Foreground        | Trait-specific | Fingerprinting  | This work | Indel       |
| MSU7_1_40426459_[Indel] | 1          | 40426459 | -13               | 0                   | qNa1L      | Foreground        | Trait-specific | Fingerprinting  | This work | Indel       |
| MSU7_1_40477292_[ -5/0] | 1          | 40477292 | -5                | 0                   | qNa1L      | Foreground        | Trait-specific | Fingerprinting  | This work | Indel       |
| MSU7_1_40497261_[Indel] | 1          | 40497261 | -124              | 0                   | qNa1L      | Foreground        | Trait-specific |                 | This work | Indel       |
| MSU7_1_40611906_[T/A]   | 1          | 40611906 | T                 | A                   | qNa1L      | Foreground        | Trait-specific | Fingerprinting  | This work | SNP         |
| MSU7_1_40614286_[Indel] | 1          | 40614286 | -11               | 0                   | qNa1L      | Foreground        | Trait-specific | Fingerprinting  | This work | Indel       |
| MSU6_Chr01_42018165     | 1          | 42019208 | T                 | C                   | qNa1L      | Background-recomb | Trait-specific |                 | This work | SNP         |
| MSU6_Chr01_42240347     | 1          | 42241391 | A                 | G                   | qNa1L      | Background-recomb | Trait-specific |                 | This work | SNP         |
| MSU6_Chr01_42877064     | 1          | 42878108 | T                 | A                   | qNa1L      | Background-recomb | Trait-specific |                 | This work | SNP         |
| MSU6_Chr01_43185541     | 1          | 43186585 | T                 | G                   | qNa1L      | Background-recomb | Trait-specific |                 | This work | SNP         |
| MSU7_1_39084567_[Indel] | 1          | 39084567 | -14               | 0                   | qSCT1      | Foreground        | Trait-specific | Fingerprinting  | This work | Indel       |
| MSU7_1_39188650_[C/T]   | 1          | 39188650 | C                 | T                   | qSCT1      | Foreground        | Trait-specific | Fingerprinting  | This work | SNP         |
| MSU7_1_39190098_[Indel] | 1          | 39190098 | 0                 | -9                  | qSCT1      | Foreground        | Trait-specific | Fingerprinting  | This work | Indel       |



Supplemental Table 4. List of marker positions interrogated for assessing biological accuracy and breeding metrics. All positions are relative to the MSU7 reference genome

| Marker name              | Chromosome | Position | Favourable allele | Unfavourable allele | Target QTL | Marker linkage    | Specificity    | Fingerprinting? | Source    | Marker type |
|--------------------------|------------|----------|-------------------|---------------------|------------|-------------------|----------------|-----------------|-----------|-------------|
| MSU7_1_39213471_[A/C]    | 1          | 39213471 | A                 | C                   | qSCT1      | Foreground        | Trait-specific | Fingerprinting  | This work | SNP         |
| MSU7_1_39246500_[A/T]    | 1          | 39246500 | A                 | T                   | qSCT1      | Foreground        | Trait-specific | Fingerprinting  | This work | SNP         |
| MSU7_1_39547975_[Indel]  | 1          | 39547975 | -19               | 0                   | qSCT1      | Foreground        | Trait-specific | Fingerprinting  | This work | Indel       |
| MSU7_1_39553459_[T/G]    | 1          | 39553459 | T                 | G                   | qSCT1      | Foreground        | Trait-specific | Fingerprinting  | This work | SNP         |
| MSU7_1_39553546_[C/T]    | 1          | 39553546 | C                 | T                   | qSCT1      | Foreground        | Trait-specific | Fingerprinting  | This work | SNP         |
| MSU7_1_39554641_[Indel]  | 1          | 39554641 | -16               | 0                   | qSCT1      | Foreground        | Trait-specific | Fingerprinting  | This work | Indel       |
| MSU7_1_39580791_[Indel]  | 1          | 39580791 | 0                 | +5                  | qSCT1      | Foreground        | Trait-specific | Fingerprinting  | This work | Indel       |
| MSU7_1_11235353_[Indel]  | 1          | 11235353 | -11               | 0                   | Saltol     | Foreground        | Trait-specific |                 | This work | Indel       |
| MSU7_1_11434110_[Indel]  | 1          | 11434110 | -9                | 0                   | Saltol     | Foreground        | Trait-specific |                 | This work | Indel       |
| jdpSKC1.5                | 1          | 11460344 | T                 | G                   | Saltol     | Foreground        | Trait-specific |                 | This work | SNP         |
| MSU7_1_11460918_[Indel]  | 1          | 11460918 | -14               | 0                   | Saltol     | Foreground        | Trait-specific |                 | This work | Indel       |
| jdpSKC1.9                | 1          | 11462124 | T                 | C                   | Saltol     | Foreground        | Trait-specific |                 | This work | SNP         |
| MSU7_1_11462282_[C/G]    | 1          | 11462282 | C                 | G                   | Saltol     | Foreground        | Trait-specific |                 | This work | SNP         |
| jdpSKC1.4                | 1          | 11462725 | T                 | C                   | Saltol     | Foreground        | Trait-specific | Fingerprinting  | This work | SNP         |
| jdpSKC1.3                | 1          | 11463299 | A                 | T                   | Saltol     | Foreground        | Trait-specific |                 | This work | SNP         |
| jdpSKC1.2                | 1          | 11463595 | A                 | C                   | Saltol     | Foreground        | Trait-specific |                 | This work | SNP         |
| MSU7_1_11469391_[Indel]  | 1          | 11469391 | -36               | 0                   | Saltol     | Foreground        | Trait-specific |                 | This work | Indel       |
| MSU7_1_11583669_[Indel]  | 1          | 11583669 | -29               | 0                   | Saltol     | Foreground        | Trait-specific |                 | This work | Indel       |
| MSU7_6_27480424_[ -9/0]  | 6          | 27480424 | -9                | 0                   | SCM2       | Foreground        | Trait-specific | Fingerprinting  | This work | Indel       |
| MSU7_6_27480778_[G/C]    | 6          | 27480778 | C                 | G                   | SCM2       | Foreground        | Trait-specific | Fingerprinting  | This work | SNP         |
| MSU7_6_27481548_[C/T]    | 6          | 27481548 | T                 | C                   | SCM2       | Foreground        | Trait-specific | Fingerprinting  | This work | SNP         |
| MSU7_6_27481897_[0/+12]  | 6          | 27481897 | T                 | TATTTTAT            | SCM2       | Foreground        | Trait-specific |                 | This work | SNP         |
| MSU7_9_6248200_[T/C]     | 9          | 6248200  | T                 | C                   | Sub1       | Foreground        | Trait-specific | Fingerprinting  | This work | SNP         |
| MSU7_9_6371914_[Indel]   | 9          | 6371914  | -7                | 0                   | Sub1       | Foreground        | Trait-specific | Fingerprinting  | This work | Indel       |
| MSU7_9_6374718_[A/G]     | 9          | 6374718  | A                 | G                   | Sub1       | Foreground        | Trait-specific | Fingerprinting  | This work | SNP         |
| MSU7_9_6381979_[A/G]     | 9          | 6381979  | A                 | G                   | Sub1       | Foreground        | Trait-specific | Fingerprinting  | This work | SNP         |
| MSU7_9_6605992_[Indel]   | 9          | 6605992  | -8                | 0                   | Sub1       | Foreground        | Trait-specific | Fingerprinting  | This work | Indel       |
| MSU7_12_16368123_[G/T]   | 12         | 16368123 | G                 | T                   | SWEET13    | Background-recomb | Trait-specific |                 | This work | SNP         |
| MSU7_12_16575958_[Indel] | 12         | 16575958 | 0                 | -10                 | SWEET13    | Background-recomb | Trait-specific |                 | This work | Indel       |
| MSU7_12_17181133_[T/C]   | 12         | 17181133 | T                 | C                   | SWEET13    | Background-recomb | Trait-specific |                 | This work | SNP         |

Supplemental Table 4. List of marker positions interrogated for assessing biological accuracy and breeding metrics. All positions are relative to the MSU7 reference genome

| Marker name              | Chromosome | Position | Favourable allele | Unfavourable allele | Target QTL | Marker linkage    | Specificity    | Fingerprinting? | Source    | Marker type |
|--------------------------|------------|----------|-------------------|---------------------|------------|-------------------|----------------|-----------------|-----------|-------------|
| MSU7_12_17304011_[Indel] | 12         | 17304011 | -10               | 0                   | SWEET13    | Foreground        | Trait-specific |                 | This work | Indel       |
| MSU7_12_17304146_[C/A]   | 12         | 17304146 | C                 | A                   | SWEET13    | Foreground        | Trait-specific |                 | This work | SNP         |
| MSU7_12_17306920_[A/C]   | 12         | 17306920 | A                 | C                   | SWEET13    | Foreground        | Trait-specific |                 | This work | SNP         |
| MSU7_12_17487095_[Indel] | 12         | 17487095 | 0                 | -32                 | SWEET13    | Background-recomb | Trait-specific |                 | This work | Indel       |
| MSU7_12_17494145_[C/A]   | 12         | 17494145 | C                 | A                   | SWEET13    | Background-recomb | Trait-specific |                 | This work | SNP         |
| MSU7_11_17906805_[Indel] | 11         | 17906805 | 0                 | -10                 | SWEET14    | Background-recomb | Trait-specific |                 | This work | Indel       |
| MSU7_11_17920870_[T/A]   | 11         | 17920870 | T                 | A                   | SWEET14    | Background-recomb | Trait-specific |                 | This work | SNP         |
| MSU7_11_17939282_[C/T]   | 11         | 17939282 | C                 | T                   | SWEET14    | Background-recomb | Trait-specific |                 | This work | SNP         |
| MSU7_11_18173234_[Indel] | 11         | 18173234 | 0                 | -11                 | SWEET14    | Foreground        | Trait-specific |                 | This work | Indel       |
| MSU7_11_18179253_[A/G]   | 11         | 18179253 | A                 | G                   | SWEET14    | Foreground        | Trait-specific |                 | This work | SNP         |
| MSU7_11_18203671_[Indel] | 11         | 18203671 | 0                 | -10                 | SWEET14    | Foreground        | Trait-specific |                 | This work | Indel       |
| MSU7_11_18244383_[Indel] | 11         | 18244383 | -17               | 0                   | SWEET14    | Foreground        | Trait-specific |                 | This work | Indel       |
| MSU7_11_18463107_[C/T]   | 11         | 18463107 | C                 | T                   | SWEET14    | Background-recomb | Trait-specific |                 | This work | SNP         |
| MSU7_11_18490050_[A/T]   | 11         | 18490050 | A                 | T                   | SWEET14    | Background-recomb | Trait-specific |                 | This work | SNP         |
| MSU7_6_25092328_[Indel]  | 6          | 25092328 | -7                | 0                   | TGW6       | Foreground        | Trait-specific |                 | This work | Indel       |
| MSU6_6_25091603_[C/T]    | 6          | 25092600 | T                 | C                   | TGW6       | Foreground        | Trait-specific |                 | This work | SNP         |
| MSU7_6_25093553_[Indel]  | 6          | 25093553 | -1                | 0                   | TGW6       | Foreground        | Trait-specific | Fingerprinting  | This work | Indel       |
| MSU6_6_25093447_[A/G]    | 6          | 25094444 | G                 | A                   | TGW6       | Foreground        | Trait-specific |                 | This work | SNP         |
| MSU7_7_22006430_[T/C]    | 7          | 22006430 | T                 | C                   | TSV1       | Foreground        | Trait-specific |                 | This work | SNP         |
| MSU7_7_22041970_[T/G]    | 7          | 22041970 | T                 | G                   | TSV1       | Foreground        | Trait-specific |                 | This work | SNP         |
| MSU7_7_22098691_[Indel]  | 7          | 22098691 | 0                 | -7                  | TSV1       | Foreground        | Trait-specific |                 | This work | Indel       |
| MSU7_7_22102272_[Indel]  | 7          | 22102272 | -9                | 0                   | TSV1       | Foreground        | Trait-specific |                 | This work | Indel       |
| MSU7_7_22117064_[A/G]    | 7          | 22117064 | A                 | G                   | TSV1       | Foreground        | Trait-specific |                 | This work | SNP         |
| MSU6_7_22117466[T/C]     | 7          | 22118459 | C                 | T                   | TSV1       | Foreground        | Trait-specific | Fingerprinting  | This work | SNP         |
| MSU6_7_22118345[G/T]     | 7          | 22119338 | T                 | G                   | TSV1       | Foreground        | Trait-specific |                 | This work | SNP         |
| MSU7_7_22119346_[A/T]    | 7          | 22119346 | A                 | T                   | TSV1       | Foreground        | Trait-specific |                 | This work | SNP         |
| MSU7_7_22119347_[A/G]    | 7          | 22119347 | G                 | A                   | TSV1       | Foreground        | Trait-specific |                 | This work | SNP         |
| MSU6_7_22118355[Indel]   | 7          | 22119347 | -3                | 0                   | TSV1       | Foreground        | Trait-specific |                 | This work | Indel       |
| MSU7_7_22123671_[Indel]  | 7          | 22123671 | +11               | 0                   | TSV1       | Foreground        | Trait-specific |                 | This work | Indel       |
| MSU7_6_1765761_[T/G]     | 6          | 1765761  | T                 | G                   | Waxy       | Foreground        | Trait-specific |                 | This work | SNP         |

Supplemental Table 4. List of marker positions interrogated for assessing biological accuracy and breeding metrics. All positions are relative to the MSU7 reference genome

| Marker name              | Chromosome | Position | Favourable allele | Unfavourable allele | Target QTL | Marker linkage    | Specificity    | Fingerprinting? | Source    | Marker type |
|--------------------------|------------|----------|-------------------|---------------------|------------|-------------------|----------------|-----------------|-----------|-------------|
| MSU7_6_1767284_[Indel]   | 6          | 1767284  | -16               | 0                   | Waxy       | Foreground        | Trait-specific |                 | This work | Indel       |
| MSU7_6_1768006_[C/A]     | 6          | 1768006  | C                 | A                   | Waxy       | Foreground        | Trait-specific | Fingerprinting  | This work | SNP         |
| MSU7_8_26250376_[Indel]  | 8          | 26250376 | 0                 | -12                 | xa13       | Background-recomb | Trait-specific |                 | This work | Indel       |
| xa13-SNP3                | 8          | 26725734 | T                 | C                   | xa13       | Foreground        | Trait-specific |                 | This work | SNP         |
| xa13-SNP2                | 8          | 26726585 | T                 | C                   | xa13       | Foreground        | Trait-specific |                 | This work | SNP         |
| xa13-SNP1                | 8          | 26727222 | C                 | G                   | xa13       | Foreground        | Trait-specific |                 | This work | SNP         |
| xa13-pro upstream        | 8          | 26729914 | -20               | 0                   | xa13       | Foreground        | Trait-specific |                 | This work | Indel       |
| MSU7_8_27519468_[Indel]  | 8          | 27519468 | 0                 | -12                 | xa13       | Background-recomb | Trait-specific |                 | This work | Indel       |
| MSU7_8_27734755_[Indel]  | 8          | 27734755 | 0                 | -21                 | xa13       | Background-recomb | Trait-specific |                 | This work | Indel       |
| MSU7_11_19880897_[Indel] | 11         | 19880897 | 0                 | -23                 | Xa21       | Background-recomb | Trait-specific |                 | This work | Indel       |
| MSU7_11_19938986_[Indel] | 11         | 19938986 | 0                 | -27                 | Xa21       | Background-recomb | Trait-specific |                 | This work | Indel       |
| MSU7_11_19940986_[Indel] | 11         | 19940986 | 0                 | -20                 | Xa21       | Background-recomb | Trait-specific |                 | This work | Indel       |
| Xa21-SNP1                | 11         | 21273275 | G                 | A                   | Xa21       | Foreground        | Trait-specific |                 | This work | SNP         |
| Xa21_indel-1             | 11         | 21274459 | +29               | 0                   | Xa21       | Foreground        | Trait-specific | Fingerprinting  | This work | Indel       |
| Xa21-SNP2                | 11         | 21276339 | T                 | C                   | Xa21       | Foreground        | Trait-specific |                 | This work | SNP         |
| Xa21-SNP3                | 11         | 21276714 | C                 | G                   | Xa21       | Foreground        | Trait-specific |                 | This work | SNP         |
| Xa21-SNP4                | 11         | 21277004 | T                 | C                   | Xa21       | Foreground        | Trait-specific |                 | This work | SNP         |
| MSU7_11_21502281_[T/C]   | 11         | 21502281 | T                 | C                   | Xa21       | Background-recomb | Trait-specific |                 | This work | SNP         |
| MSU7_11_22950926_[Indel] | 11         | 22950926 | 0                 | -13                 | Xa21       | Background-recomb | Trait-specific |                 | This work | Indel       |
| MSU7_11_22042058_[Indel] | 11         | 22042058 | -7                | 0                   | Xa23       | Foreground        | Trait-specific |                 | This work | Indel       |
| MSU7_11_22141523_[A/G]   | 11         | 22141523 | A                 | G                   | Xa23       | Foreground        | Trait-specific |                 | This work | SNP         |
| MSU7_11_22142546_[Indel] | 11         | 22142546 | 0                 | -15                 | Xa23       | Foreground        | Trait-specific |                 | This work | Indel       |
| MSU7_11_22175063_[G/T]   | 11         | 22175063 | G                 | T                   | Xa23       | Foreground        | Trait-specific | Fingerprinting  | This work | SNP         |
| MSU7_11_22225387_[T/A]   | 11         | 22225387 | T                 | A                   | Xa23       | Foreground        | Trait-specific |                 | This work | SNP         |
| MSU7_11_22225882_[G/A]   | 11         | 22225882 | G                 | A                   | Xa23       | Foreground        | Trait-specific |                 | This work | SNP         |
| MSU7_11_22230977_[Indel] | 11         | 22230977 | 0                 | -9                  | Xa23       | Foreground        | Trait-specific |                 | This work | Indel       |
| MSU7_11_22261158_[A/T]   | 11         | 22261158 | A                 | T                   | Xa23       | Foreground        | Trait-specific |                 | This work | SNP         |
| MSU7_11_22309091_[G/A]   | 11         | 22309091 | G                 | A                   | Xa23       | Foreground        | Trait-specific |                 | This work | SNP         |
| MSU7_11_26406261_[Indel] | 11         | 26406261 | -32               | 0                   | Xa4        | Background-recomb | Trait-specific |                 | This work | Indel       |
| MSU7_11_27119887_[Indel] | 11         | 27119887 | -15               | 0                   | Xa4        | Background-recomb | Trait-specific | Fingerprinting  | This work | Indel       |

Supplemental Table 4. List of marker positions interrogated for assessing biological accuracy and breeding metrics. All positions are relative to the MSU7 reference genome

| Marker name              | Chromosome | Position | Favourable allele | Unfavourable allele | Target QTL | Marker linkage    | Specificity    | Fingerprinting? | Source    | Marker type |
|--------------------------|------------|----------|-------------------|---------------------|------------|-------------------|----------------|-----------------|-----------|-------------|
| MSU7_11_27122941_[T/A]   | 11         | 27122941 | T                 | A                   | Xa4        | Foreground        | Trait-specific | Fingerprinting  | This work | SNP         |
| MSU7_11_27265090_[Indel] | 11         | 27265090 | -43               | 0                   | Xa4        | Background-recomb | Trait-specific | Fingerprinting  | This work | Indel       |
| MSU7_11_27353895_[Indel] | 11         | 27353895 | -16               | 0                   | Xa4        | Background-recomb | Trait-specific | Fingerprinting  | This work | Indel       |
| MSU7_11_27585379_[Indel] | 11         | 27585379 | -10               | 0                   | Xa4        | Foreground        | Trait-specific | Fingerprinting  | This work | Indel       |
| MSU7_11_28005031_[Indel] | 11         | 28005031 | -13               | 0                   | Xa4        | Foreground        | Trait-specific |                 | This work | Indel       |
| MSU7_11_28009751_[T/C]   | 11         | 28009751 | T                 | C                   | Xa4        | Foreground        | Trait-specific |                 | This work | SNP         |
| MSU7_11_28124705_[C/G]   | 11         | 28124705 | C                 | G                   | Xa4        | Foreground        | Trait-specific |                 | This work | SNP         |
| MSU7_11_28224947_[Indel] | 11         | 28224947 | -15               | 0                   | Xa4        | Foreground        | Trait-specific |                 | This work | Indel       |
| MSU7_11_28365515_[Indel] | 11         | 28365515 | -9                | 0                   | Xa4        | Foreground        | Trait-specific |                 | This work | Indel       |
| MSU7_11_28704769_[T/G]   | 11         | 28704769 | T                 | G                   | Xa4        | Foreground        | Trait-specific | Fingerprinting  | This work | SNP         |
| MSU7_5_436945_[A/G]      | 5          | 436945   | A                 | G                   | Xa5        | Foreground        | Trait-specific |                 | This work | SNP         |
| MSU7_5_438578_[T/C]      | 5          | 438578   | T                 | C                   | Xa5        | Foreground        | Trait-specific |                 | This work | SNP         |
| MSU7_5_438902_[0/-35]    | 5          | 438902   | 0                 | -35                 | Xa5        | Foreground        | Trait-specific |                 | This work | Indel       |
| MSU7_6_27891614_[C/G]    | 6          | 27891614 | C                 | G                   | Xa7        | Foreground        | Trait-specific |                 | This work | SNP         |
| MSU7_6_27891667_[Indel]  | 6          | 27891667 | -14               | 0                   | Xa7        | Foreground        | Trait-specific | Fingerprinting  | This work | Indel       |
| MSU7_6_27912418_[Indel]  | 6          | 27912418 | -7                | 0                   | Xa7        | Foreground        | Trait-specific | Fingerprinting  | This work | Indel       |
| MSU7_6_27917038_[Indel]  | 6          | 27917038 | -16               | 0                   | Xa7        | Foreground        | Trait-specific | Fingerprinting  | This work | Indel       |
| MSU7_6_27919547_[T/G]    | 6          | 27919547 | T                 | G                   | Xa7        | Foreground        | Trait-specific | Fingerprinting  | This work | SNP         |
| MSU7_6_27959630_[Indel]  | 6          | 27959630 | -8                | 0                   | Xa7        | Foreground        | Trait-specific | Fingerprinting  | This work | Indel       |
| MSU7_6_28010904_[Indel]  | 6          | 28010904 | -8                | 0                   | Xa7        | Foreground        | Trait-specific | Fingerprinting  | This work | Indel       |
| MSU7_6_28011120_[G/A]    | 6          | 28011120 | G                 | A                   | Xa7        | Foreground        | Trait-specific | Fingerprinting  | This work | SNP         |
| MSU7_6_28016299_[Indel]  | 6          | 28016299 | -19               | 0                   | Xa7        | Foreground        | Trait-specific | Fingerprinting  | This work | Indel       |
| MSU7_6_28082926_[Indel]  | 6          | 28082926 | 0                 | -11                 | Xa7        | Foreground        | Trait-specific |                 | This work | Indel       |
| MSU7_6_28187269_[A/G]    | 6          | 28187269 | A                 | G                   | Xa7        | Foreground        | Trait-specific | Fingerprinting  | This work | SNP         |
