# Supplementary material for: Criteria for evaluating molecular markers: Comprehensive quality metrics to improve marker-assisted selection
Source: PubMed Central journal article supplement (PMC6333336; doi:10.1371/journal.pone.0210529), 2019-01-15
Supplement: pone.0210529.s005.pdf [file pone.0210529.s005.pdf]

Supplemental Table 5. List of QTL examined, with start and end positions.

| Trait category   | Target QTL                         | Chromosome | Start    | End      |
|------------------|------------------------------------|------------|----------|----------|
| Abiotic stress   | AG1                                | 9          | 12036453 | 12545658 |
| Abiotic stress   | COLD1                              | 4          | 30174083 | 31052578 |
| Abiotic stress   | LTG1                               | 2          | 24693023 | 24787561 |
| Abiotic stress   | qSCT1                              | 1          | 39076741 | 40477292 |
| Abiotic stress   | DTY1.1                             | 1          | 37925965 | 40473982 |
| Abiotic stress   | DTY12.1                            | 12         | 17066946 | 17571574 |
| Abiotic stress   | DTY2.1                             | 2          | 9570228  | 12035419 |
| Abiotic stress   | DTY2.2                             | 2          | 209765   | 8882316  |
| Abiotic stress   | DTY3.1                             | 3          | 28587948 | 31393778 |
| Abiotic stress   | DTY3.2                             | 3          | 180286   | 13032396 |
| Abiotic stress   | DTY4.1                             | 4          | 59946    | 3557787  |
| Abiotic stress   | HTSF4.1                            | 4          | 17474229 | 20149751 |
| Abiotic stress   | qNa1L                              | 1          | 37782482 | 40997165 |
| Abiotic stress   | Saltol                             | 1          | 11110274 | 11739003 |
| Abiotic stress   | Sub1                               | 9          | 6191930  | 6774928  |
| Biotic stress    | Pi35(t)                            | 1          | 32898485 | 33321905 |
| Biotic stress    | Pi54                               | 11         | 24843208 | 25974491 |
| Biotic stress    | Pi9                                | 6          | 10049864 | 10677685 |
| Biotic stress    | Pita2                              | 12         | 9177624  | 11069613 |
| Biotic stress    | xa13                               | 8          | 26316287 | 27300242 |
| Biotic stress    | Xa21                               | 11         | 19941316 | 21508416 |
| Biotic stress    | Xa23                               | 11         | 22008834 | 22923998 |
| Biotic stress    | Xa4                                | 11         | 25974491 | 28804914 |
| Biotic stress    | Xa5                                | 5          | 255323   | 767585   |
| Biotic stress    | Xa7                                | 6          | 27609767 | 28187269 |
| Biotic stress    | BPH17                              | 4          | 6835634  | 7195884  |
| Biotic stress    | BPH3                               | 6          | 1272777  | 1768006  |
| Biotic stress    | TSV1                               | 7          | 21998892 | 22381105 |
| Grain quality    | frg-1                              | 8          | 20213731 | 20413803 |
| Grain quality    | SSIIa (gelatinisation temperature) | 6          | 6508525  | 6891960  |
| Grain quality    | GW5/SW5                            | 5          | 5256714  | 5588965  |
| Grain quality    | Waxy                               | 6          | 1501961  | 1934659  |
| Grain quality    | Chalk5                             | 5          | 3253516  | 3470087  |
| Grain quality    | PGWC8-2                            | 8          | 25757847 | 26074700 |
| Grain quality    | GS3                                | 3          | 16688962 | 16889939 |
| Maturity         | DTH8                               | 8          | 4101332  | 4603854  |
| Maturity         | Hd9                                | 3          | 996213   | 1851409  |
| Yield components | DEP1                               | 8          | 16394577 | 16523573 |
| Yield components | Gn1a                               | 1          | 4949689  | 5608892  |
| Yield components | NAL1                               | 4          | 30307709 | 31419137 |
| Yield components | SCM2                               | 6          | 27371995 | 27609767 |
| Yield components | TGW6                               | 6          | 24875490 | 25387111 |
